# Supplementary material
Source: PubMed Central journal article supplement (PMC3887225)
Supplement: NIHMS537877-supplement-02.pdf [file NIHMS537877-supplement-02.pdf]

**TABLE 1**  
PIP Signature

| Gene name | PIP (day 5 versus 1) |       | PIP (day 7 versus 1) |       | PIP (day 9 versus 1) |       | PIP (day 11 versus 1) |       |
|-----------|----------------------|-------|----------------------|-------|----------------------|-------|-----------------------|-------|
|           | p-value              | FC    | p-value              | FC    | p-value              | FC    | p-value               | FC    |
| DLX5      | 1.48E-19             | 17.52 | 1.37E-21             | 37.64 | 9.61E-22             | 40.21 | 3.14E-21              | 32.45 |
| HAPLN1    | 2.37E-11             | 2.52  | 2.89E-20             | 14.87 | 3.61E-21             | 20.06 | 3.02E-21              | 20.62 |
| SULF1     | 3.23E-05             | -1.36 | 1.77E-12             | 2.43  | 1.12E-21             | 14.15 | 1.94E-23              | 25.80 |
| ERP27     | 3.09E-12             | 2.41  | 2.42E-22             | 18.69 | 1.77E-23             | 28.22 | 1.70E-23              | 28.40 |
| FOXC1     | 4.48E-09             | 1.95  | 1.04E-20             | 16.10 | 3.51E-22             | 27.03 | 4.41E-22              | 26.04 |
| TFAP2A    | 1.94E-17             | 9.14  | 8.73E-19             | 13.36 | 5.42E-19             | 14.23 | 3.01E-20              | 21.66 |
| TFAP2A    | 1.94E-17             | 9.14  | 8.73E-19             | 13.36 | 5.42E-19             | 14.23 | 3.01E-20              | 21.66 |
| TFAP2A    | 1.94E-17             | 9.14  | 8.73E-19             | 13.36 | 5.42E-19             | 14.23 | 3.01E-20              | 21.66 |
| TFAP2A    | 1.94E-17             | 9.14  | 8.73E-19             | 13.36 | 5.42E-19             | 14.23 | 3.01E-20              | 21.66 |
| GAS1      | 3.91E-26             | 14.44 | 1.05E-28             | 36.33 | 4.83E-30             | 66.10 | 8.78E-31              | 96.03 |
| FLRT3     | 2.05E-21             | 8.74  | 1.57E-19             | 5.70  | 3.93E-23             | 14.10 | 3.74E-23              | 14.19 |
| CGA       | 0.0014057            | 1.61  | 1.70E-07             | 2.74  | 1.17E-13             | 9.77  | 1.18E-15              | 18.18 |
| ISL1      | 0.375112             | 1.05  | 1.93E-14             | 3.13  | 4.39E-21             | 12.22 | 5.04E-20              | 9.13  |
| ISL1      | 0.375112             | 1.05  | 1.93E-14             | 3.13  | 4.39E-21             | 12.22 | 5.04E-20              | 9.13  |
| ISL1      | 0.375112             | 1.05  | 1.93E-14             | 3.13  | 4.39E-21             | 12.22 | 5.04E-20              | 9.13  |
| ISL1      | 0.375112             | 1.05  | 1.93E-14             | 3.13  | 4.39E-21             | 12.22 | 5.04E-20              | 9.13  |
| CDH6      | 1.10E-17             | 4.10  | 1.36E-16             | 3.45  | 3.70E-19             | 5.35  | 1.20E-16              | 3.48  |
| CTNNA2    | 6.32E-15             | 3.10  | 7.71E-19             | 6.06  | 7.61E-19             | 6.06  | 4.22E-22              | 13.94 |
| OTX1      | 0.0004423            | 1.58  | 8.60E-13             | 5.62  | 3.76E-14             | 7.68  | 6.79E-16              | 12.35 |
| OTX1      | 0.0004423            | 1.58  | 8.60E-13             | 5.62  | 3.76E-14             | 7.68  | 6.79E-16              | 12.35 |
| ALDH1A1   | 0.014164             | -1.27 | 0.246741             | -1.11 | 1.64E-09             | 2.49  | 6.16E-17              | 9.95  |
| EMP1      | 0.0097998            | 1.16  | 3.45E-13             | 2.36  | 5.84E-23             | 15.32 | 1.21E-22              | 13.89 |
| SMPDL3A   | 0.138292             | -1.09 | 5.25E-07             | 1.49  | 7.37E-19             | 6.14  | 3.05E-20              | 8.44  |
| SMPDL3A   | 0.138292             | -1.09 | 5.25E-07             | 1.49  | 7.37E-19             | 6.14  | 3.05E-20              | 8.44  |
| FREM2     | 6.81E-10             | 1.80  | 5.11E-18             | 4.90  | 1.57E-18             | 5.40  | 1.01E-21              | 11.56 |
| FREM2     | 6.81E-10             | 1.80  | 5.11E-18             | 4.90  | 1.57E-18             | 5.40  | 1.01E-21              | 11.56 |
| PROS1     | 3.51E-15             | 2.95  | 8.01E-21             | 8.18  | 1.09E-20             | 7.92  | 4.80E-22              | 11.27 |
| PROS1     | 3.51E-15             | 2.95  | 8.01E-21             | 8.18  | 1.09E-20             | 7.92  | 4.80E-22              | 11.27 |
| PROS1     | 3.51E-15             | 2.95  | 8.01E-21             | 8.18  | 1.09E-20             | 7.92  | 4.80E-22              | 11.27 |
| EMX2      | 0.769588             | 1.03  | 5.21E-07             | 2.26  | 4.55E-10             | 3.54  | 9.09E-14              | 7.51  |
| LGI1      | 9.04E-10             | 2.67  | 1.12E-12             | 4.17  | 3.96E-16             | 8.74  | 1.24E-16              | 9.98  |
| LGI1      | 9.04E-10             | 2.67  | 1.12E-12             | 4.17  | 3.96E-16             | 8.74  | 1.24E-16              | 9.98  |
| LGI1      | 9.04E-10             | 2.67  | 1.12E-12             | 4.17  | 3.96E-16             | 8.74  | 1.24E-16              | 9.98  |
| DKK1      | 4.04E-13             | 5.92  | 5.40E-16             | 12.40 | 2.36E-13             | 6.24  | 2.30E-14              | 7.93  |
| RIMBP2    | 0.0002822            | 1.40  | 1.06E-11             | 2.88  | 2.67E-14             | 4.30  | 1.11E-17              | 8.87  |
| GREM1     | 0.182109             | -1.10 | 0.0002755            | 1.37  | 5.24E-09             | 1.99  | 5.42E-06              | 1.54  |
| ZFH3      | 0.309331             | -1.08 | 7.22E-06             | 1.58  | 6.33E-10             | 2.32  | 4.75E-15              | 4.95  |
| ZFH3      | 0.309331             | -1.08 | 7.22E-06             | 1.58  | 6.33E-10             | 2.32  | 4.75E-15              | 4.95  |
| HS.554261 | 0.0025325            | 1.23  | 2.38E-16             | 4.21  | 1.32E-16             | 4.40  | 6.05E-20              | 8.97  |
| HS.554261 | 0.0025325            | 1.23  | 2.38E-16             | 4.21  | 1.32E-16             | 4.40  | 6.05E-20              | 8.97  |
| HS.554261 | 0.0025325            | 1.23  | 2.38E-16             | 4.21  | 1.32E-16             | 4.40  | 6.05E-20              | 8.97  |
| MEIS2     | 7.98E-12             | 1.73  | 2.94E-20             | 4.52  | 4.44E-23             | 8.12  | 4.35E-24              | 10.52 |
| SIX6      | 2.36E-07             | 1.80  | 1.29E-13             | 3.85  | 8.89E-19             | 12.14 | 9.95E-18              | 9.09  |
| DDIT4L    | 1.40E-12             | 2.35  | 1.70E-15             | 3.37  | 4.27E-21             | 10.48 | 3.55E-19              | 6.54  |
| ANKRD1    | 5.08E-10             | 2.12  | 1.58E-12             | 2.81  | 1.46E-13             | 3.23  | 4.66E-12              | 2.65  |
| ABCA4     | 0.272396             | 1.10  | 3.96E-10             | 2.63  | 7.15E-15             | 5.75  | 6.78E-16              | 7.22  |
| ANKRD38   | 0.203389             | -1.12 | 0.050505             | 1.20  | 2.15E-10             | 2.74  | 1.62E-15              | 6.69  |
| EPSTI1    | 0.510918             | 1.05  | 3.34E-11             | 2.67  | 5.78E-17             | 7.25  | 4.41E-16              | 5.96  |
| FAM89A    | 3.38E-06             | 1.38  | 2.71E-18             | 4.69  | 7.76E-20             | 6.37  | 1.65E-19              | 5.94  |

**TABLE 1**  
PIP Signature

|           |           |       |           |       |          |       |          |       |
|-----------|-----------|-------|-----------|-------|----------|-------|----------|-------|
| POU4F1    | 0.705476  | 1.03  | 9.39E-11  | 2.36  | 1.97E-15 | 4.61  | 3.56E-17 | 6.55  |
| POU4F1    | 0.705476  | 1.03  | 9.39E-11  | 2.36  | 1.97E-15 | 4.61  | 3.56E-17 | 6.55  |
| POU4F1    | 0.705476  | 1.03  | 9.39E-11  | 2.36  | 1.97E-15 | 4.61  | 3.56E-17 | 6.55  |
| DLX3      | 5.55E-14  | 3.56  | 2.67E-17  | 6.61  | 6.24E-18 | 7.65  | 7.57E-18 | 7.50  |
| CCL2      | 1.10E-08  | 1.91  | 1.91E-08  | 1.87  | 6.02E-10 | 2.16  | 5.02E-17 | 6.32  |
| HEY1      | 6.73E-05  | -1.49 | 0.0001507 | -1.45 | 2.71E-12 | 3.26  | 1.47E-10 | 2.58  |
| HS6ST2    | 1.13E-14  | 4.67  | 8.87E-17  | 7.26  | 4.85E-18 | 9.98  | 1.95E-17 | 8.52  |
| GPR177    | 8.17E-05  | 1.35  | 6.73E-15  | 3.49  | 7.67E-18 | 5.90  | 4.08E-17 | 5.10  |
| TFPI      | 1.78E-15  | 2.91  | 4.95E-18  | 4.25  | 2.36E-20 | 6.68  | 1.65E-21 | 8.78  |
| TFAP2B    | 0.277658  | 1.11  | 1.73E-05  | 1.66  | 1.60E-10 | 2.95  | 1.05E-13 | 5.02  |
| TFAP2B    | 0.277658  | 1.11  | 1.73E-05  | 1.66  | 1.60E-10 | 2.95  | 1.05E-13 | 5.02  |
| TFAP2B    | 0.277658  | 1.11  | 1.73E-05  | 1.66  | 1.60E-10 | 2.95  | 1.05E-13 | 5.02  |
| SYTL4     | 0.000849  | 1.39  | 1.14E-09  | 2.42  | 4.38E-15 | 5.72  | 2.77E-14 | 4.87  |
| SYTL4     | 0.000849  | 1.39  | 1.14E-09  | 2.42  | 4.38E-15 | 5.72  | 2.77E-14 | 4.87  |
| SYTL4     | 0.000849  | 1.39  | 1.14E-09  | 2.42  | 4.38E-15 | 5.72  | 2.77E-14 | 4.87  |
| MAP1LC3C  | 0.101703  | 1.17  | 0.116941  | 1.17  | 6.11E-09 | 2.46  | 1.29E-16 | 10.54 |
| MAP1LC3C  | 0.101703  | 1.17  | 0.116941  | 1.17  | 6.11E-09 | 2.46  | 1.29E-16 | 10.54 |
| INS-IGF2  | 0.0539006 | 1.21  | 2.13E-05  | 1.68  | 1.22E-10 | 3.10  | 4.06E-14 | 5.74  |
| INS-IGF2  | 0.0539006 | 1.21  | 2.13E-05  | 1.68  | 1.22E-10 | 3.10  | 4.06E-14 | 5.74  |
| SEMA3C    | 0.0012582 | -1.23 | 0.654666  | 1.03  | 7.79E-12 | 2.15  | 7.65E-18 | 4.87  |
| SEMA3C    | 0.0012582 | -1.23 | 0.654666  | 1.03  | 7.79E-12 | 2.15  | 7.65E-18 | 4.87  |
| HES4      | 1.29E-13  | 3.06  | 1.42E-16  | 4.93  | 9.51E-19 | 7.85  | 2.61E-21 | 16.09 |
| ANGPT2    | 0.253243  | 1.10  | 1.34E-06  | 1.69  | 6.17E-17 | 7.52  | 1.19E-14 | 4.65  |
| BOC       | 9.31E-17  | 4.89  | 2.64E-19  | 8.52  | 4.99E-21 | 13.73 | 5.82E-22 | 18.54 |
| BCMO1     | 0.0050528 | 1.41  | 0.092121  | 1.21  | 4.15E-05 | 1.76  | 3.13E-12 | 4.97  |
| GRP       | 0.0629202 | 1.16  | 2.04E-06  | 1.65  | 1.64E-08 | 1.99  | 1.80E-14 | 4.38  |
| TNC       | 1.53E-05  | 1.56  | 2.84E-15  | 5.37  | 8.47E-18 | 9.66  | 8.93E-14 | 4.07  |
| TNC       | 1.53E-05  | 1.56  | 2.84E-15  | 5.37  | 8.47E-18 | 9.66  | 8.93E-14 | 4.07  |
| CHX10     | 0.284734  | -1.06 | 1.58E-10  | 1.92  | 4.66E-13 | 2.46  | 3.21E-16 | 3.74  |
| ARID5B    | 2.09E-07  | -1.57 | 0.567962  | -1.03 | 6.82E-10 | 1.90  | 6.89E-13 | 2.55  |
| EYA1      | 1.53E-07  | 1.40  | 3.42E-19  | 4.30  | 1.39E-22 | 8.72  | 2.12E-20 | 5.37  |
| TTC29     | 1.26E-10  | -2.12 | 1.05E-07  | -1.65 | 7.14E-06 | -1.45 | 1.04E-10 | 2.14  |
| HS.126022 | 0.481657  | 1.04  | 1.42E-15  | 3.61  | 3.28E-16 | 4.00  | 1.14E-16 | 4.32  |
| ADAM28    | 0.807751  | 1.02  | 1.43E-09  | 2.26  | 9.37E-12 | 2.95  | 1.57E-13 | 3.85  |
| LEF1      | 1.38E-12  | 3.65  | 6.99E-15  | 5.56  | 5.39E-17 | 9.08  | 3.87E-17 | 9.43  |
| LOC650494 | 0.667898  | 1.02  | 9.34E-11  | 1.84  | 2.41E-20 | 6.91  | 2.14E-16 | 3.37  |
| LOC650494 | 0.667898  | 1.02  | 9.34E-11  | 1.84  | 2.41E-20 | 6.91  | 2.14E-16 | 3.37  |
| EDNRA     | 1.35E-07  | 1.91  | 4.50E-11  | 2.84  | 2.23E-13 | 4.02  | 4.25E-16 | 6.90  |
| CPE       | 0.0070449 | 1.29  | 0.0005128 | 1.42  | 5.81E-14 | 4.65  | 7.94E-15 | 5.51  |
| SHISA2    | 2.04E-22  | 19.08 | 1.89E-23  | 27.77 | 1.51E-22 | 19.96 | 1.98E-21 | 13.87 |
| EVI1      | 0.133617  | 1.11  | 4.19E-12  | 2.66  | 4.57E-18 | 7.42  | 2.27E-14 | 3.64  |
| SLITRK4   | 2.96E-06  | 1.35  | 3.62E-16  | 3.10  | 1.25E-17 | 3.83  | 1.32E-20 | 6.71  |
| SLITRK4   | 2.96E-06  | 1.35  | 3.62E-16  | 3.10  | 1.25E-17 | 3.83  | 1.32E-20 | 6.71  |
| IFI16     | 1.86E-07  | 1.73  | 4.31E-10  | 2.22  | 4.62E-16 | 5.31  | 2.71E-16 | 5.56  |
| HS.105791 | 2.07E-07  | 1.49  | 2.14E-09  | 1.70  | 1.86E-13 | 2.43  | 7.77E-17 | 3.79  |
| GATA3     | 1.34E-05  | 1.55  | 3.71E-12  | 3.07  | 1.69E-13 | 3.76  | 4.79E-14 | 4.13  |
| HS.386897 | 0.0399299 | -1.16 | 0.0358315 | 1.16  | 1.06E-08 | 1.87  | 7.14E-13 | 2.94  |
| GOLSYN    | 0.0229891 | -1.19 | 0.0071094 | 1.24  | 9.48E-14 | 3.63  | 1.70E-12 | 3.02  |
| PDGFC     | 5.04E-08  | -1.55 | 0.042315  | -1.12 | 1.69E-08 | 1.60  | 3.36E-16 | 3.48  |
| PDGFC     | 5.04E-08  | -1.55 | 0.042315  | -1.12 | 1.69E-08 | 1.60  | 3.36E-16 | 3.48  |
| PDGFC     | 5.04E-08  | -1.55 | 0.042315  | -1.12 | 1.69E-08 | 1.60  | 3.36E-16 | 3.48  |

**TABLE 1**  
PIP Signature

|           |           |       |           |       |           |      |           |      |
|-----------|-----------|-------|-----------|-------|-----------|------|-----------|------|
| YPEL2     | 5.26E-13  | 2.50  | 1.17E-15  | 3.55  | 6.78E-17  | 4.33 | 1.27E-19  | 7.55 |
| YPEL2     | 5.26E-13  | 2.50  | 1.17E-15  | 3.55  | 6.78E-17  | 4.33 | 1.27E-19  | 7.55 |
| SOSTDC1   | 0.0698706 | -1.15 | 2.05E-08  | 1.92  | 8.32E-11  | 2.47 | 5.28E-12  | 2.86 |
| LOC644907 | 5.90E-05  | -1.64 | 0.0044174 | -1.37 | 0.0975492 | 1.18 | 2.78E-05  | 1.69 |
| SGPP2     | 0.0395979 | 1.08  | 3.39E-14  | 1.90  | 1.55E-19  | 3.36 | 5.19E-20  | 3.60 |
| SGPP2     | 0.0395979 | 1.08  | 3.39E-14  | 1.90  | 1.55E-19  | 3.36 | 5.19E-20  | 3.60 |
| SGPP2     | 0.0395979 | 1.08  | 3.39E-14  | 1.90  | 1.55E-19  | 3.36 | 5.19E-20  | 3.60 |
| PRDM1     | 6.89E-12  | 2.22  | 4.38E-15  | 3.27  | 4.30E-16  | 3.80 | 5.77E-15  | 3.21 |
| PRDM1     | 6.89E-12  | 2.22  | 4.38E-15  | 3.27  | 4.30E-16  | 3.80 | 5.77E-15  | 3.21 |
| PRDM1     | 6.89E-12  | 2.22  | 4.38E-15  | 3.27  | 4.30E-16  | 3.80 | 5.77E-15  | 3.21 |
| PRDM1     | 6.89E-12  | 2.22  | 4.38E-15  | 3.27  | 4.30E-16  | 3.80 | 5.77E-15  | 3.21 |
| LOC653158 | 1.29E-10  | 2.05  | 4.92E-14  | 3.01  | 4.00E-14  | 3.04 | 3.58E-15  | 3.54 |
| PAQR9     | 0.35491   | 1.04  | 2.49E-14  | 2.33  | 8.19E-19  | 4.22 | 5.62E-17  | 3.19 |
| PAQR9     | 0.35491   | 1.04  | 2.49E-14  | 2.33  | 8.19E-19  | 4.22 | 5.62E-17  | 3.19 |
| PAQR9     | 0.35491   | 1.04  | 2.49E-14  | 2.33  | 8.19E-19  | 4.22 | 5.62E-17  | 3.19 |
| CRIP1     | 8.39E-07  | 1.73  | 0.0024073 | 1.31  | 9.63E-14  | 4.05 | 3.07E-13  | 3.73 |
| RAB25     | 1.56E-06  | 1.60  | 1.03E-13  | 3.44  | 3.47E-11  | 2.46 | 9.11E-12  | 2.64 |
| RAB25     | 1.56E-06  | 1.60  | 1.03E-13  | 3.44  | 3.47E-11  | 2.46 | 9.11E-12  | 2.64 |
| RAB25     | 1.56E-06  | 1.60  | 1.03E-13  | 3.44  | 3.47E-11  | 2.46 | 9.11E-12  | 2.64 |
| COLEC12   | 0.577043  | 1.03  | 3.39E-05  | 1.36  | 2.34E-16  | 4.12 | 8.12E-18  | 5.38 |
| GANAB     | 0.0013703 | 1.92  | 0.0139224 | 1.60  | 2.68E-05  | 2.59 | 0.0011712 | 1.94 |
| EFNA1     | 3.84E-08  | 1.71  | 8.97E-13  | 2.68  | 5.82E-17  | 5.12 | 1.15E-18  | 7.36 |
| RHOBTB3   | 4.94E-09  | 1.87  | 1.67E-10  | 2.15  | 1.69E-15  | 4.14 | 1.70E-16  | 4.96 |
| RHOBTB3   | 4.94E-09  | 1.87  | 1.67E-10  | 2.15  | 1.69E-15  | 4.14 | 1.70E-16  | 4.96 |
| RHOBTB3   | 4.94E-09  | 1.87  | 1.67E-10  | 2.15  | 1.69E-15  | 4.14 | 1.70E-16  | 4.96 |
| HLA-DRB5  | 3.16E-07  | 1.61  | 2.27E-14  | 3.37  | 4.52E-07  | 1.59 | 2.12E-15  | 3.96 |
| SLIT2     | 0.0015481 | -1.27 | 0.552702  | -1.04 | 1.46E-09  | 1.97 | 2.89E-12  | 2.61 |
| SLIT2     | 0.0015481 | -1.27 | 0.552702  | -1.04 | 1.46E-09  | 1.97 | 2.89E-12  | 2.61 |
| KCNJ2     | 8.39E-07  | -1.55 | 0.783342  | -1.02 | 3.80E-13  | 2.82 | 1.00E-10  | 2.15 |
| KCNJ2     | 8.39E-07  | -1.55 | 0.783342  | -1.02 | 3.80E-13  | 2.82 | 1.00E-10  | 2.15 |
| PRKD1     | 1.01E-10  | 2.13  | 3.17E-14  | 3.23  | 6.88E-15  | 3.57 | 3.14E-15  | 3.76 |
| ID4       | 2.06E-16  | 4.05  | 2.11E-14  | 3.00  | 1.40E-16  | 4.17 | 9.32E-15  | 3.15 |
| SERTAD2   | 7.64E-13  | 2.28  | 2.88E-16  | 3.48  | 3.30E-16  | 3.45 | 5.42E-17  | 3.89 |
| LOC643911 | 6.31E-06  | 1.36  | 7.30E-11  | 1.87  | 1.25E-14  | 2.72 | 1.25E-15  | 3.08 |
| SERPINF1  | 1.31E-09  | 2.01  | 1.12E-13  | 3.23  | 3.54E-15  | 4.08 | 9.07E-17  | 5.47 |
| EPAS1     | 5.13E-12  | -2.08 | 0.892225  | 1.01  | 6.78E-12  | 2.05 | 7.55E-14  | 2.50 |
| PTHR1     | 5.96E-07  | 1.70  | 7.62E-05  | 1.44  | 5.50E-08  | 1.86 | 5.54E-14  | 3.88 |
| TMPRSS4   | 0.62233   | 1.04  | 0.0585409 | 1.17  | 2.27E-05  | 1.53 | 1.39E-12  | 3.29 |
| TMPRSS4   | 0.62233   | 1.04  | 0.0585409 | 1.17  | 2.27E-05  | 1.53 | 1.39E-12  | 3.29 |
| SLC27A2   | 0.0001181 | -1.30 | 0.0002252 | -1.28 | 3.69E-09  | 1.72 | 3.46E-11  | 2.03 |
| SLC27A2   | 0.0001181 | -1.30 | 0.0002252 | -1.28 | 3.69E-09  | 1.72 | 3.46E-11  | 2.03 |
| C5ORF30   | 0.157979  | 1.11  | 0.0074514 | 1.23  | 1.74E-06  | 1.60 | 3.54E-10  | 2.23 |
| HS.125056 | 0.95557   | 1.00  | 5.72E-08  | 1.93  | 1.20E-10  | 2.58 | 7.12E-14  | 4.14 |
| TP73L     | 0.295769  | 1.08  | 0.0086582 | 1.22  | 1.56E-07  | 1.72 | 2.58E-13  | 3.22 |
| TP73L     | 0.295769  | 1.08  | 0.0086582 | 1.22  | 1.56E-07  | 1.72 | 2.58E-13  | 3.22 |
| VTCN1     | 0.225954  | 1.13  | 0.0020123 | 1.40  | 1.57E-12  | 4.34 | 5.24E-12  | 3.95 |
| VTCN1     | 0.225954  | 1.13  | 0.0020123 | 1.40  | 1.57E-12  | 4.34 | 5.24E-12  | 3.95 |
| LOC646345 | 0.0071221 | 1.17  | 1.76E-11  | 2.06  | 3.18E-19  | 6.25 | 1.64E-15  | 3.26 |
| PLA2G4A   | 0.437395  | 1.05  | 8.43E-10  | 1.96  | 8.77E-12  | 2.38 | 6.98E-14  | 3.08 |
| PLA2G4A   | 0.437395  | 1.05  | 8.43E-10  | 1.96  | 8.77E-12  | 2.38 | 6.98E-14  | 3.08 |
| PLA2G4A   | 0.437395  | 1.05  | 8.43E-10  | 1.96  | 8.77E-12  | 2.38 | 6.98E-14  | 3.08 |

**TABLE 1**  
PIP Signature

|           |           |       |           |       |          |       |           |       |
|-----------|-----------|-------|-----------|-------|----------|-------|-----------|-------|
| MORC4     | 2.44E-13  | -1.71 | 0.0130386 | -1.09 | 3.82E-08 | 1.31  | 1.24E-15  | 2.03  |
| DCUN1D4   | 9.11E-05  | 1.40  | 1.10E-05  | 1.49  | 5.60E-10 | 2.14  | 0.0001677 | 1.37  |
| C4ORF32   | 4.56E-05  | -1.48 | 0.435511  | -1.06 | 3.44E-07 | 1.76  | 3.61E-10  | 2.37  |
| ZNF608    | 3.70E-09  | 2.21  | 1.22E-10  | 2.62  | 2.75E-10 | 2.51  | 2.32E-12  | 3.32  |
| HS.475733 | 0.0333151 | 1.12  | 6.96E-14  | 2.52  | 2.88E-14 | 2.64  | 3.23E-16  | 3.41  |
| HS.475733 | 0.0333151 | 1.12  | 6.96E-14  | 2.52  | 2.88E-14 | 2.64  | 3.23E-16  | 3.41  |
| HS.475733 | 0.0333151 | 1.12  | 6.96E-14  | 2.52  | 2.88E-14 | 2.64  | 3.23E-16  | 3.41  |
| DDIT3     | 0.0402448 | -1.15 | 0.0205624 | 1.17  | 9.49E-08 | 1.66  | 2.15E-12  | 2.58  |
| HAND1     | 3.76E-13  | 2.98  | 1.23E-11  | 2.47  | 9.34E-19 | 8.42  | 2.79E-14  | 3.50  |
| ID1       | 2.46E-11  | 1.67  | 0.322841  | 1.04  | 1.97E-12 | 1.80  | 9.30E-08  | 1.37  |
| ID1       | 2.46E-11  | 1.67  | 0.322841  | 1.04  | 1.97E-12 | 1.80  | 9.30E-08  | 1.37  |
| HS.552826 | 2.05E-08  | 2.04  | 5.50E-12  | 3.14  | 3.98E-12 | 3.20  | 2.45E-12  | 3.30  |
| HS.552826 | 2.05E-08  | 2.04  | 5.50E-12  | 3.14  | 3.98E-12 | 3.20  | 2.45E-12  | 3.30  |
| HS.552826 | 2.05E-08  | 2.04  | 5.50E-12  | 3.14  | 3.98E-12 | 3.20  | 2.45E-12  | 3.30  |
| RIN2      | 6.57E-13  | 1.91  | 8.98E-18  | 3.20  | 1.64E-16 | 2.73  | 1.17E-19  | 4.27  |
| RELN      | 0.173868  | 1.15  | 4.04E-06  | 1.86  | 2.24E-08 | 2.41  | 1.41E-09  | 2.82  |
| RELN      | 0.173868  | 1.15  | 4.04E-06  | 1.86  | 2.24E-08 | 2.41  | 1.41E-09  | 2.82  |
| RELN      | 0.173868  | 1.15  | 4.04E-06  | 1.86  | 2.24E-08 | 2.41  | 1.41E-09  | 2.82  |
| LMX1A     | 3.49E-12  | 2.08  | 1.82E-16  | 3.43  | 1.76E-16 | 3.44  | 7.46E-15  | 2.77  |
| LMX1A     | 3.49E-12  | 2.08  | 1.82E-16  | 3.43  | 1.76E-16 | 3.44  | 7.46E-15  | 2.77  |
| LMX1A     | 3.49E-12  | 2.08  | 1.82E-16  | 3.43  | 1.76E-16 | 3.44  | 7.46E-15  | 2.77  |
| MSX2      | 9.91E-10  | 1.95  | 3.63E-12  | 2.50  | 2.09E-16 | 4.64  | 8.44E-13  | 2.70  |
| MSX2      | 9.91E-10  | 1.95  | 3.63E-12  | 2.50  | 2.09E-16 | 4.64  | 8.44E-13  | 2.70  |
| MSX2      | 9.91E-10  | 1.95  | 3.63E-12  | 2.50  | 2.09E-16 | 4.64  | 8.44E-13  | 2.70  |
| MSX2      | 9.91E-10  | 1.95  | 3.63E-12  | 2.50  | 2.09E-16 | 4.64  | 8.44E-13  | 2.70  |
| ID2       | 1.05E-18  | 13.28 | 1.58E-17  | 9.51  | 7.17E-19 | 13.98 | 1.02E-18  | 13.34 |
| PLCE1     | 2.05E-05  | 1.34  | 1.25E-14  | 2.86  | 8.39E-13 | 2.32  | 1.04E-14  | 2.89  |
| PLCE1     | 2.05E-05  | 1.34  | 1.25E-14  | 2.86  | 8.39E-13 | 2.32  | 1.04E-14  | 2.89  |
| MXRA5     | 1.16E-11  | 2.19  | 1.03E-13  | 2.75  | 7.27E-13 | 2.49  | 6.70E-14  | 2.81  |
| CTSO      | 2.36E-07  | 1.66  | 1.61E-11  | 2.45  | 3.88E-13 | 3.00  | 1.09E-15  | 4.46  |
| EHBP1     | 2.82E-09  | 1.39  | 2.80E-16  | 2.20  | 2.13E-11 | 1.54  | 3.13E-20  | 3.52  |
| GDF6      | 0.24405   | 1.08  | 0.0001646 | 1.34  | 4.10E-13 | 2.81  | 1.01E-12  | 2.68  |
| KLHL14    | 2.19E-05  | 1.43  | 0.033917  | 1.16  | 4.35E-13 | 2.90  | 5.90E-17  | 5.46  |
| KLHL14    | 2.19E-05  | 1.43  | 0.033917  | 1.16  | 4.35E-13 | 2.90  | 5.90E-17  | 5.46  |
| HS.489857 | 1.45E-05  | 1.47  | 5.84E-05  | 1.41  | 1.27E-12 | 2.89  | 3.53E-08  | 1.80  |
| HS.489857 | 1.45E-05  | 1.47  | 5.84E-05  | 1.41  | 1.27E-12 | 2.89  | 3.53E-08  | 1.80  |
| HS.489857 | 1.45E-05  | 1.47  | 5.84E-05  | 1.41  | 1.27E-12 | 2.89  | 3.53E-08  | 1.80  |
| HS.347034 | 0.875468  | -1.01 | 0.0007688 | 1.33  | 4.62E-07 | 1.69  | 7.19E-12  | 2.77  |
| BMP4      | 1.85E-09  | 2.33  | 5.43E-10  | 2.48  | 3.41E-11 | 2.89  | 2.09E-14  | 4.87  |
| FAM110B   | 0.366625  | 1.07  | 6.45E-05  | 1.42  | 1.52E-09 | 2.06  | 4.07E-09  | 1.98  |
| MUC15     | 0.906718  | 1.01  | 0.0003478 | 1.38  | 1.22E-06 | 1.68  | 1.18E-10  | 2.50  |
| MUC15     | 0.906718  | 1.01  | 0.0003478 | 1.38  | 1.22E-06 | 1.68  | 1.18E-10  | 2.50  |
| MAFB      | 1.48E-09  | 1.90  | 2.42E-17  | 5.42  | 3.76E-21 | 14.01 | 6.60E-16  | 4.16  |
| MAFB      | 1.48E-09  | 1.90  | 2.42E-17  | 5.42  | 3.76E-21 | 14.01 | 6.60E-16  | 4.16  |
| MAFB      | 1.48E-09  | 1.90  | 2.42E-17  | 5.42  | 3.76E-21 | 14.01 | 6.60E-16  | 4.16  |
| ERMP1     | 2.46E-13  | 2.16  | 1.55E-13  | 2.20  | 1.10E-11 | 1.87  | 2.18E-17  | 3.50  |
| HMGCS2    | 0.0023913 | 1.18  | 0.191345  | 1.07  | 1.49E-08 | 1.55  | 5.10E-13  | 2.18  |
| PTPN13    | 5.47E-12  | 2.45  | 3.47E-14  | 3.24  | 1.27E-14 | 3.46  | 3.98E-14  | 3.22  |
| VEGFC     | 0.0010888 | 1.28  | 3.28E-07  | 1.61  | 4.35E-05 | 1.40  | 2.15E-12  | 2.63  |
| VWF       | 2.35E-21  | 28.36 | 5.55E-21  | 24.60 | 6.67E-19 | 12.33 | 4.81E-16  | 6.01  |
| RSPO3     | 5.18E-08  | 1.64  | 9.28E-12  | 2.26  | 6.47E-11 | 2.08  | 5.51E-13  | 2.59  |

**TABLE 1**  
PIP Signature

|           |           |       |           |       |           |       |           |       |
|-----------|-----------|-------|-----------|-------|-----------|-------|-----------|-------|
| HMCN1     | 0.130995  | 1.13  | 2.49E-05  | 1.53  | 0.0006145 | 1.38  | 1.10E-08  | 2.07  |
| HS.22689  | 0.847171  | 1.01  | 3.39E-06  | 1.52  | 1.19E-05  | 1.46  | 4.23E-10  | 2.09  |
| HS.22689  | 0.847171  | 1.01  | 3.39E-06  | 1.52  | 1.19E-05  | 1.46  | 4.23E-10  | 2.09  |
| HS.22689  | 0.847171  | 1.01  | 3.39E-06  | 1.52  | 1.19E-05  | 1.46  | 4.23E-10  | 2.09  |
| HS.479288 | 0.651825  | 1.03  | 0.138426  | 1.11  | 4.42E-10  | 2.14  | 5.65E-12  | 2.64  |
| HS.479288 | 0.651825  | 1.03  | 0.138426  | 1.11  | 4.42E-10  | 2.14  | 5.65E-12  | 2.64  |
| MSX1      | 2.99E-09  | 1.96  | 5.33E-12  | 2.61  | 2.10E-18  | 7.99  | 2.54E-16  | 5.08  |
| TRIM38    | 1.99E-10  | 1.79  | 5.32E-16  | 3.17  | 1.79E-13  | 2.34  | 3.09E-16  | 3.28  |
| TRIM38    | 1.99E-10  | 1.79  | 5.32E-16  | 3.17  | 1.79E-13  | 2.34  | 3.09E-16  | 3.28  |
| TRIM38    | 1.99E-10  | 1.79  | 5.32E-16  | 3.17  | 1.79E-13  | 2.34  | 3.09E-16  | 3.28  |
| ZNF679    | 0.042372  | 1.34  | 0.0059148 | 1.52  | 0.181695  | 1.21  | 0.0133358 | 1.44  |
| AMDHD1    | 0.0102586 | 1.25  | 0.0011915 | 1.34  | 6.51E-09  | 2.12  | 9.25E-11  | 2.61  |
| SIX1      | 0.812051  | 1.02  | 0.0014207 | 1.32  | 8.37E-09  | 2.03  | 9.95E-10  | 2.23  |
| SIX1      | 0.812051  | 1.02  | 0.0014207 | 1.32  | 8.37E-09  | 2.03  | 9.95E-10  | 2.23  |
| SFRS11    | 0.0056062 | 1.22  | 0.180095  | 1.09  | 0.307706  | 1.07  | 0.0007983 | 1.29  |
| SMAD6     | 1.21E-17  | 3.75  | 2.45E-15  | 2.73  | 1.44E-11  | 1.88  | 6.32E-14  | 2.33  |
| HS.93739  | 0.0185553 | 1.16  | 0.0002416 | 1.30  | 1.34E-05  | 1.41  | 2.22E-12  | 2.45  |
| EPHB3     | 1.77E-06  | 1.47  | 1.30E-10  | 2.00  | 1.09E-11  | 2.22  | 3.89E-12  | 2.33  |
| ELF5      | 0.0033855 | 1.12  | 3.59E-09  | 1.42  | 8.68E-13  | 1.74  | 8.59E-17  | 2.46  |
| CEBPA     | 1.33E-10  | 1.78  | 1.35E-12  | 2.11  | 5.53E-13  | 2.18  | 2.02E-12  | 2.07  |
| FILIP1    | 5.50E-17  | 6.39  | 1.63E-12  | 2.95  | 1.03E-10  | 2.36  | 1.27E-16  | 5.91  |
| RBP1      | 8.52E-12  | 2.08  | 1.50E-09  | 1.73  | 1.96E-17  | 4.28  | 2.37E-18  | 5.06  |
| MMRN1     | 0.394573  | 1.05  | 0.832584  | -1.01 | 0.829126  | 1.01  | 3.88E-11  | 2.00  |
| RARB      | 0.0988544 | 1.06  | 5.56E-15  | 2.12  | 2.03E-15  | 2.21  | 1.26E-16  | 2.50  |
| RARB      | 0.0988544 | 1.06  | 5.56E-15  | 2.12  | 2.03E-15  | 2.21  | 1.26E-16  | 2.50  |
| RARB      | 0.0988544 | 1.06  | 5.56E-15  | 2.12  | 2.03E-15  | 2.21  | 1.26E-16  | 2.50  |
| EPS8      | 3.18E-06  | 1.62  | 1.24E-09  | 2.23  | 7.15E-12  | 2.92  | 7.66E-12  | 2.91  |
| KHDRBS3   | 0.0007248 | 1.18  | 8.19E-09  | 1.49  | 7.93E-10  | 1.58  | 5.46E-10  | 1.59  |
| HS.560401 | 0.817508  | 1.02  | 0.205667  | 1.12  | 0.0001557 | 1.48  | 3.28E-09  | 2.33  |
| OPN3      | 1.15E-06  | 1.48  | 1.87E-05  | 1.37  | 0.0006478 | 1.26  | 1.15E-11  | 2.19  |
| CLIC6     | 2.90E-14  | 3.34  | 2.96E-13  | 2.90  | 1.79E-18  | 7.31  | 9.65E-19  | 7.79  |
| LOC730746 | 0.0012699 | 1.39  | 0.0004725 | 1.45  | 0.0279244 | 1.23  | 7.44E-05  | 1.55  |
| PDE4D     | 1.06E-10  | -2.68 | 3.53E-08  | -2.01 | 0.401291  | 1.07  | 0.0568332 | -1.18 |
| PDE4D     | 1.06E-10  | -2.68 | 3.53E-08  | -2.01 | 0.401291  | 1.07  | 0.0568332 | -1.18 |
| ZNF750    | 0.0035794 | 1.20  | 9.59E-12  | 2.14  | 2.15E-16  | 3.81  | 2.70E-14  | 2.83  |
| ZNF750    | 0.0035794 | 1.20  | 9.59E-12  | 2.14  | 2.15E-16  | 3.81  | 2.70E-14  | 2.83  |
| ZNF750    | 0.0035794 | 1.20  | 9.59E-12  | 2.14  | 2.15E-16  | 3.81  | 2.70E-14  | 2.83  |
| HS.19193  | 0.0011208 | 1.30  | 5.95E-09  | 1.94  | 0.0317447 | 1.17  | 2.36E-10  | 2.23  |
| C1ORF53   | 0.0079459 | -1.16 | 0.0001888 | 1.26  | 2.58E-16  | 3.43  | 1.18E-10  | 1.85  |
| BMP2      | 0.235558  | -1.09 | 8.77E-12  | 2.74  | 1.77E-12  | 3.00  | 1.54E-10  | 2.36  |
| VGLL1     | 0.33368   | -1.08 | 0.992732  | -1.00 | 0.0207844 | 1.22  | 1.41E-07  | 1.87  |
| MERTK     | 0.0007206 | 1.17  | 6.74E-08  | 1.39  | 3.67E-11  | 1.68  | 1.21E-17  | 3.12  |
| MERTK     | 0.0007206 | 1.17  | 6.74E-08  | 1.39  | 3.67E-11  | 1.68  | 1.21E-17  | 3.12  |
| ABCA13    | 0.905037  | 1.01  | 0.46463   | 1.06  | 1.61E-08  | 2.07  | 9.21E-09  | 2.12  |
| DYNC111   | 3.00E-17  | 5.25  | 1.18E-18  | 7.08  | 1.20E-16  | 4.69  | 4.79E-16  | 4.21  |
| PERP      | 0.0235571 | 1.13  | 2.75E-09  | 1.67  | 2.79E-11  | 1.95  | 1.05E-10  | 1.86  |
| PTPRF     | 0.738545  | -1.02 | 3.92E-05  | 1.42  | 2.87E-05  | 1.44  | 1.77E-07  | 1.69  |
| HS.18081  | 0.917077  | -1.01 | 0.2044    | -1.13 | 0.912797  | -1.01 | 1.03E-06  | 1.87  |
| C12ORF64  | 0.250314  | 1.04  | 0.0203305 | 1.09  | 5.89E-09  | 1.41  | 1.48E-14  | 2.02  |
| STOM      | 3.59E-18  | 3.13  | 1.08E-20  | 4.63  | 9.83E-18  | 2.96  | 8.15E-18  | 2.99  |
| STOM      | 3.59E-18  | 3.13  | 1.08E-20  | 4.63  | 9.83E-18  | 2.96  | 8.15E-18  | 2.99  |

**TABLE 1**  
PIP Signature

|           |           |       |           |       |           |       |           |       |
|-----------|-----------|-------|-----------|-------|-----------|-------|-----------|-------|
| SNX10     | 4.77E-05  | 1.42  | 2.82E-09  | 1.97  | 2.70E-05  | 1.44  | 6.64E-11  | 2.33  |
| HS.572444 | 6.53E-09  | 1.64  | 5.86E-11  | 1.92  | 7.82E-16  | 3.28  | 9.13E-15  | 2.84  |
| SLN       | 0.257138  | 1.10  | 0.898113  | -1.01 | 0.0031974 | 1.30  | 2.48E-08  | 1.99  |
| SPHAR     | 1.52E-05  | 1.59  | 6.70E-05  | 1.51  | 1.54E-05  | 1.59  | 3.38E-06  | 1.68  |
| F2RL2     | 0.630086  | -1.03 | 0.411981  | 1.05  | 1.49E-09  | 1.81  | 6.46E-11  | 2.04  |
| ROBO2     | 0.66688   | 1.02  | 0.189906  | 1.08  | 0.0157705 | 1.16  | 2.68E-09  | 1.76  |
| KLF5      | 1.06E-05  | -1.65 | 0.0151851 | -1.26 | 0.286837  | -1.10 | 0.400549  | 1.08  |
| KLF5      | 1.06E-05  | -1.65 | 0.0151851 | -1.26 | 0.286837  | -1.10 | 0.400549  | 1.08  |
| LRRC1     | 0.180269  | 1.04  | 1.09E-12  | 1.57  | 1.93E-16  | 2.04  | 5.40E-16  | 1.96  |
| LRRC1     | 0.180269  | 1.04  | 1.09E-12  | 1.57  | 1.93E-16  | 2.04  | 5.40E-16  | 1.96  |
| BMP5      | 0.0231535 | 1.14  | 1.27E-08  | 1.62  | 8.16E-11  | 1.91  | 3.38E-12  | 2.16  |
| MPZL2     | 0.0724664 | -1.09 | 2.80E-10  | 1.64  | 6.60E-13  | 2.00  | 1.17E-11  | 1.81  |
| MPZL2     | 0.0724664 | -1.09 | 2.80E-10  | 1.64  | 6.60E-13  | 2.00  | 1.17E-11  | 1.81  |
| TLL1      | 0.570934  | 1.05  | 0.48683   | 1.06  | 7.26E-10  | 2.50  | 2.94E-07  | 1.88  |
| TLL1      | 0.570934  | 1.05  | 0.48683   | 1.06  | 7.26E-10  | 2.50  | 2.94E-07  | 1.88  |
| HAS2      | 0.0001193 | -1.33 | 0.0035146 | -1.22 | 0.0005269 | 1.28  | 0.219921  | -1.08 |
| ENPEP     | 0.0010192 | -1.19 | 0.381182  | -1.04 | 7.29E-12  | 1.87  | 2.64E-11  | 1.79  |
| RERG      | 2.39E-10  | -2.06 | 0.109191  | 1.11  | 3.49E-14  | 3.22  | 0.0111867 | -1.19 |
| RERG      | 2.39E-10  | -2.06 | 0.109191  | 1.11  | 3.49E-14  | 3.22  | 0.0111867 | -1.19 |
| RERG      | 2.39E-10  | -2.06 | 0.109191  | 1.11  | 3.49E-14  | 3.22  | 0.0111867 | -1.19 |
| SCARA3    | 2.37E-12  | -1.64 | 3.62E-10  | -1.45 | 0.0119831 | -1.10 | 0.0532114 | 1.07  |
| SCARA3    | 2.37E-12  | -1.64 | 3.62E-10  | -1.45 | 0.0119831 | -1.10 | 0.0532114 | 1.07  |
| ATP6V1B1  | 1.09E-11  | 2.75  | 2.58E-15  | 4.84  | 2.24E-16  | 5.98  | 2.88E-20  | 16.88 |
| LINGO2    | 0.0101003 | 1.17  | 2.41E-09  | 1.77  | 8.54E-06  | 1.40  | 1.25E-13  | 2.69  |
| ARID3B    | 3.27E-05  | -1.46 | 0.259702  | 1.09  | 0.014001  | 1.21  | 0.0009117 | 1.32  |
| TSC22D2   | 0.0406011 | 1.16  | 0.0006712 | 1.31  | 2.37E-05  | 1.44  | 9.83E-09  | 1.87  |
| CXXC5     | 0.0013822 | 1.27  | 0.535293  | -1.04 | 0.002228  | 1.26  | 0.333016  | 1.07  |
| SH3RF2    | 0.0274453 | -1.21 | 0.120664  | -1.14 | 4.96E-05  | 1.51  | 0.0001313 | 1.46  |
| TACC1     | 2.69E-07  | -1.47 | 5.84E-06  | -1.36 | 0.0137549 | 1.15  | 3.17E-06  | 1.38  |
| TACC1     | 2.69E-07  | -1.47 | 5.84E-06  | -1.36 | 0.0137549 | 1.15  | 3.17E-06  | 1.38  |
| GAD1      | 5.44E-23  | 5.45  | 1.04E-22  | 5.16  | 2.91E-19  | 3.00  | 4.51E-18  | 2.60  |
| NOG       | 0.104496  | 1.13  | 3.66E-06  | 1.55  | 3.42E-06  | 1.56  | 3.17E-09  | 2.01  |
| SPTLC3    | 0.851454  | -1.01 | 0.10978   | 1.11  | 4.32E-08  | 1.74  | 3.08E-08  | 1.76  |
| SPTLC3    | 0.851454  | -1.01 | 0.10978   | 1.11  | 4.32E-08  | 1.74  | 3.08E-08  | 1.76  |
| LOC57228  | 4.42E-08  | 1.51  | 2.42E-13  | 2.27  | 7.83E-13  | 2.16  | 2.06E-14  | 2.55  |
| LOC57228  | 4.42E-08  | 1.51  | 2.42E-13  | 2.27  | 7.83E-13  | 2.16  | 2.06E-14  | 2.55  |
| LOC57228  | 4.42E-08  | 1.51  | 2.42E-13  | 2.27  | 7.83E-13  | 2.16  | 2.06E-14  | 2.55  |
| IRX5      | 2.05E-17  | 5.54  | 4.91E-17  | 5.14  | 7.61E-17  | 4.96  | 5.52E-19  | 7.84  |
| IRX5      | 2.05E-17  | 5.54  | 4.91E-17  | 5.14  | 7.61E-17  | 4.96  | 5.52E-19  | 7.84  |
| IRX5      | 2.05E-17  | 5.54  | 4.91E-17  | 5.14  | 7.61E-17  | 4.96  | 5.52E-19  | 7.84  |
| ARHGAP10  | 2.77E-05  | -1.43 | 0.0022851 | -1.26 | 0.0011171 | 1.29  | 0.0012745 | 1.28  |
| ESRRG     | 0.0192871 | 1.14  | 5.39E-11  | 1.95  | 1.49E-15  | 3.22  | 3.99E-12  | 2.16  |
| TMEM62    | 1.66E-06  | -1.43 | 0.455087  | -1.04 | 0.0006696 | 1.24  | 0.0002341 | 1.27  |
| TMEM62    | 1.66E-06  | -1.43 | 0.455087  | -1.04 | 0.0006696 | 1.24  | 0.0002341 | 1.27  |
| SAT1      | 0.0002354 | 1.19  | 3.15E-16  | 2.52  | 4.57E-18  | 3.15  | 5.41E-18  | 3.12  |
| ST6GALNAC | 0.788983  | -1.02 | 0.0208396 | 1.18  | 0.0001312 | 1.37  | 9.96E-08  | 1.72  |
| SEMA3F    | 0.0002867 | 1.36  | 1.10E-08  | 1.92  | 1.53E-09  | 2.08  | 6.34E-11  | 2.41  |
| SPRYD5    | 0.347616  | 1.05  | 2.75E-05  | 1.34  | 0.160813  | 1.08  | 1.56E-08  | 1.63  |
| S100P     | 1.76E-06  | 1.47  | 0.0010741 | 1.25  | 1.15E-05  | 1.40  | 1.52E-13  | 2.72  |
| ACPP      | 4.12E-07  | 1.65  | 2.95E-12  | 2.75  | 1.23E-10  | 2.28  | 1.17E-12  | 2.90  |
| ACPP      | 4.12E-07  | 1.65  | 2.95E-12  | 2.75  | 1.23E-10  | 2.28  | 1.17E-12  | 2.90  |

**TABLE 1**  
PIP Signature

|           |           |       |           |       |           |      |           |      |
|-----------|-----------|-------|-----------|-------|-----------|------|-----------|------|
| ELF1      | 0.0017933 | 1.17  | 1.62E-06  | 1.34  | 3.75E-05  | 1.26 | 9.25E-13  | 1.98 |
| HS.4988   | 1.97E-06  | -1.62 | 0.817743  | -1.02 | 0.0121232 | 1.22 | 0.0030431 | 1.28 |
| HS.4988   | 1.97E-06  | -1.62 | 0.817743  | -1.02 | 0.0121232 | 1.22 | 0.0030431 | 1.28 |
| HS.4988   | 1.97E-06  | -1.62 | 0.817743  | -1.02 | 0.0121232 | 1.22 | 0.0030431 | 1.28 |
| AKR1B10   | 0.367947  | 1.07  | 3.06E-05  | 1.45  | 6.71E-07  | 1.64 | 9.60E-08  | 1.75 |
| DYNLRB2   | 0.495281  | 1.06  | 0.115939  | 1.14  | 3.81E-05  | 1.50 | 2.48E-07  | 1.80 |
| METRNL    | 0.0015807 | -1.15 | 5.84E-07  | 1.32  | 0.0015146 | 1.15 | 3.40E-11  | 1.66 |
| CXCR7     | 0.000261  | -1.22 | 0.305545  | 1.05  | 1.10E-15  | 2.71 | 2.59E-14  | 2.33 |
| EDN3      | 0.616779  | 1.02  | 7.34E-05  | 1.26  | 7.21E-14  | 2.31 | 4.50E-12  | 1.95 |
| NPNT      | 0.0753955 | -1.12 | 0.965416  | 1.00  | 0.420898  | 1.05 | 6.98E-08  | 1.64 |
| SUMO2     | 1.02E-06  | 1.27  | 2.51E-08  | 1.36  | 0.0010016 | 1.14 | 1.95E-07  | 1.31 |
| SLCO6A1   | 3.07E-05  | 1.38  | 5.73E-08  | 1.65  | 0.024216  | 1.16 | 1.27E-11  | 2.27 |
| S100A16   | 0.295016  | 1.07  | 3.39E-06  | 1.52  | 8.12E-13  | 2.83 | 1.62E-11  | 2.42 |
| S100A16   | 0.295016  | 1.07  | 3.39E-06  | 1.52  | 8.12E-13  | 2.83 | 1.62E-11  | 2.42 |
| ANK3      | 0.0692768 | -1.10 | 4.70E-05  | 1.30  | 0.356459  | 1.05 | 2.73E-07  | 1.46 |
| RGL2      | 2.79E-05  | 1.30  | 8.26E-13  | 2.18  | 8.01E-11  | 1.83 | 2.95E-13  | 2.28 |
| PGM2      | 0.675119  | -1.02 | 0.0859566 | 1.08  | 1.78E-14  | 2.28 | 7.98E-09  | 1.49 |
| DAPL1     | 0.187435  | 1.10  | 0.324219  | 1.08  | 0.0884159 | 1.14 | 1.01E-07  | 1.79 |
| GPR37     | 2.53E-09  | -1.50 | 0.0008433 | -1.17 | 0.0044375 | 1.14 | 1.02E-09  | 1.54 |
| MAOA      | 1.80E-11  | 2.01  | 2.31E-12  | 2.18  | 6.71E-12  | 2.09 | 1.64E-13  | 2.46 |
| MAOA      | 1.80E-11  | 2.01  | 2.31E-12  | 2.18  | 6.71E-12  | 2.09 | 1.64E-13  | 2.46 |
| FAM110A   | 2.02E-06  | 1.54  | 2.13E-08  | 1.79  | 1.36E-08  | 1.82 | 4.21E-10  | 2.09 |
| SAMD11    | 1.98E-08  | 1.85  | 0.0124362 | 1.21  | 0.0006584 | 1.32 | 0.0008671 | 1.31 |
| SAMD11    | 1.98E-08  | 1.85  | 0.0124362 | 1.21  | 0.0006584 | 1.32 | 0.0008671 | 1.31 |
| ADAMTS18  | 0.577317  | -1.03 | 0.191312  | 1.07  | 0.0058061 | 1.16 | 5.78E-09  | 1.61 |
| AIPL1     | 0.001528  | 1.22  | 4.31E-08  | 1.60  | 2.77E-09  | 1.74 | 9.33E-10  | 1.81 |
| S100A13   | 2.36E-09  | 1.62  | 7.96E-12  | 1.95  | 2.86E-15  | 2.77 | 1.89E-13  | 2.27 |
| DISP1     | 4.07E-14  | 2.72  | 1.13E-14  | 2.92  | 2.54E-15  | 3.19 | 7.20E-17  | 4.03 |
| C20ORF75  | 3.73E-07  | -1.69 | 0.151366  | -1.11 | 0.0003599 | 1.35 | 0.415353  | 1.06 |
| KRT8      | 0.0039826 | 1.27  | 3.65E-10  | 2.28  | 2.50E-13  | 3.42 | 8.36E-12  | 2.77 |
| KRT8      | 0.0039826 | 1.27  | 3.65E-10  | 2.28  | 2.50E-13  | 3.42 | 8.36E-12  | 2.77 |
| KRT8      | 0.0039826 | 1.27  | 3.65E-10  | 2.28  | 2.50E-13  | 3.42 | 8.36E-12  | 2.77 |
| AKTIP     | 0.0024997 | -1.25 | 0.235657  | -1.08 | 0.0829484 | 1.12 | 0.017223  | 1.18 |
| RAB11FIP4 | 2.14E-10  | 2.34  | 3.03E-11  | 2.58  | 3.41E-07  | 1.72 | 5.27E-12  | 2.84 |
| RAB11FIP4 | 2.14E-10  | 2.34  | 3.03E-11  | 2.58  | 3.41E-07  | 1.72 | 5.27E-12  | 2.84 |
| AMOT      | 0.0087802 | 1.20  | 7.19E-07  | 1.55  | 3.17E-15  | 3.75 | 6.57E-15  | 3.57 |
| DUSP26    | 0.242499  | -1.08 | 0.0585848 | 1.13  | 6.00E-05  | 1.36 | 3.78E-09  | 1.84 |
| KRT19     | 6.66E-08  | 1.44  | 1.00E-13  | 2.20  | 3.94E-16  | 2.87 | 1.49E-16  | 3.03 |
| KRT19     | 6.66E-08  | 1.44  | 1.00E-13  | 2.20  | 3.94E-16  | 2.87 | 1.49E-16  | 3.03 |
| KRT19     | 6.66E-08  | 1.44  | 1.00E-13  | 2.20  | 3.94E-16  | 2.87 | 1.49E-16  | 3.03 |
| PCDH17    | 2.53E-16  | 3.32  | 1.08E-15  | 3.04  | 7.33E-15  | 2.74 | 1.02E-10  | 1.83 |
| LOC644743 | 1.94E-06  | 1.46  | 5.12E-12  | 2.29  | 8.72E-15  | 3.20 | 6.34E-13  | 2.53 |
| LOC644743 | 1.94E-06  | 1.46  | 5.12E-12  | 2.29  | 8.72E-15  | 3.20 | 6.34E-13  | 2.53 |
| LOC644743 | 1.94E-06  | 1.46  | 5.12E-12  | 2.29  | 8.72E-15  | 3.20 | 6.34E-13  | 2.53 |
| TMEM79    | 0.0402863 | 1.17  | 2.60E-06  | 1.61  | 2.55E-10  | 2.33 | 1.10E-07  | 1.80 |
| TMEM79    | 0.0402863 | 1.17  | 2.60E-06  | 1.61  | 2.55E-10  | 2.33 | 1.10E-07  | 1.80 |
| TMEM79    | 0.0402863 | 1.17  | 2.60E-06  | 1.61  | 2.55E-10  | 2.33 | 1.10E-07  | 1.80 |
| ATP7B     | 2.47E-06  | 1.24  | 1.32E-13  | 1.78  | 5.54E-10  | 1.44 | 3.47E-13  | 1.73 |
| TPD52L1   | 2.73E-05  | -1.27 | 1.02E-07  | 1.42  | 1.11E-13  | 2.16 | 3.81E-12  | 1.89 |
| TPD52L1   | 2.73E-05  | -1.27 | 1.02E-07  | 1.42  | 1.11E-13  | 2.16 | 3.81E-12  | 1.89 |
| TPD52L1   | 2.73E-05  | -1.27 | 1.02E-07  | 1.42  | 1.11E-13  | 2.16 | 3.81E-12  | 1.89 |

**TABLE 1**  
PIP Signature

|           |           |       |           |       |           |       |           |       |
|-----------|-----------|-------|-----------|-------|-----------|-------|-----------|-------|
| TNFRSF19  | 3.85E-16  | 4.35  | 1.64E-15  | 3.91  | 9.70E-13  | 2.65  | 1.06E-12  | 2.64  |
| C3ORF28   | 0.0002834 | 1.51  | 0.0383607 | 1.23  | 0.0375353 | 1.23  | 0.191216  | 1.14  |
| MYH6      | 0.0894753 | 1.11  | 0.243217  | 1.07  | 0.26841   | 1.07  | 1.52E-07  | 1.56  |
| HS.375535 | 0.864684  | 1.01  | 0.0043247 | 1.19  | 5.46E-09  | 1.69  | 2.92E-08  | 1.61  |
| HS.375535 | 0.864684  | 1.01  | 0.0043247 | 1.19  | 5.46E-09  | 1.69  | 2.92E-08  | 1.61  |
| LOC647954 | 9.00E-05  | 1.32  | 6.63E-11  | 2.03  | 5.30E-16  | 3.75  | 1.04E-12  | 2.43  |
| LOC647954 | 9.00E-05  | 1.32  | 6.63E-11  | 2.03  | 5.30E-16  | 3.75  | 1.04E-12  | 2.43  |
| LOC647954 | 9.00E-05  | 1.32  | 6.63E-11  | 2.03  | 5.30E-16  | 3.75  | 1.04E-12  | 2.43  |
| ID3       | 1.12E-19  | 5.77  | 3.56E-18  | 4.35  | 4.50E-21  | 7.86  | 8.85E-20  | 5.89  |
| ID3       | 1.12E-19  | 5.77  | 3.56E-18  | 4.35  | 4.50E-21  | 7.86  | 8.85E-20  | 5.89  |
| HS.136841 | 0.174488  | 1.09  | 0.0015904 | 1.26  | 1.61E-05  | 1.42  | 1.01E-09  | 1.95  |
| LRP4      | 0.0119284 | -1.27 | 0.0531531 | 1.19  | 0.0012465 | 1.38  | 0.0001006 | 1.51  |
| PRLR      | 0.0016497 | 1.34  | 0.4865    | 1.06  | 0.0662413 | 1.17  | 6.00E-05  | 1.51  |
| HS.98418  | 0.74537   | 1.03  | 0.006513  | 1.30  | 0.0025212 | 1.35  | 0.0008424 | 1.40  |
| LOC730130 | 0.242818  | 1.10  | 0.465307  | 1.06  | 0.000325  | 1.41  | 0.0063111 | 1.27  |
| LOC730130 | 0.242818  | 1.10  | 0.465307  | 1.06  | 0.000325  | 1.41  | 0.0063111 | 1.27  |
| HS.539808 | 0.66898   | -1.03 | 9.49E-05  | 1.43  | 1.01E-06  | 1.66  | 1.93E-06  | 1.63  |
| HS.539808 | 0.66898   | -1.03 | 9.49E-05  | 1.43  | 1.01E-06  | 1.66  | 1.93E-06  | 1.63  |
| OR7E91P   | 0.572638  | -1.03 | 7.26E-06  | 1.30  | 6.65E-09  | 1.53  | 7.78E-11  | 1.73  |
| HLA-DRB3  | 0.209697  | 1.11  | 0.002185  | 1.33  | 0.039456  | 1.20  | 7.17E-07  | 1.78  |
| ITPR1     | 0.789965  | 1.02  | 0.0057811 | -1.20 | 0.081935  | 1.11  | 0.0015409 | 1.24  |
| HS.128375 | 0.240385  | 1.13  | 0.45135   | 1.08  | 0.11254   | 1.18  | 1.68E-05  | 1.73  |
| RBBP4     | 0.083824  | 1.18  | 0.105846  | 1.17  | 0.0830889 | 1.18  | 0.385886  | 1.08  |
| CLDN4     | 0.0144944 | 1.26  | 1.48E-05  | 1.63  | 5.72E-06  | 1.69  | 1.66E-08  | 2.17  |
| C2ORF15   | 7.95E-09  | 1.78  | 1.05E-09  | 1.92  | 1.22E-12  | 2.58  | 6.51E-09  | 1.79  |
| TRIM55    | 0.857646  | 1.01  | 0.406582  | 1.04  | 3.93E-10  | 1.76  | 1.41E-07  | 1.49  |
| IGSF11    | 0.000105  | 1.20  | 8.34E-12  | 1.68  | 5.08E-16  | 2.39  | 1.36E-16  | 2.54  |
| TMEM144   | 8.65E-11  | 2.26  | 2.73E-12  | 2.69  | 3.21E-10  | 2.14  | 4.08E-13  | 2.99  |
| TMEM144   | 8.65E-11  | 2.26  | 2.73E-12  | 2.69  | 3.21E-10  | 2.14  | 4.08E-13  | 2.99  |
| LPAR5     | 4.10E-07  | 1.81  | 2.30E-08  | 2.04  | 0.06524   | 1.17  | 9.88E-05  | 1.48  |
| PLCL1     | 0.590506  | -1.03 | 0.0144345 | 1.14  | 4.10E-10  | 1.76  | 5.06E-06  | 1.36  |
| IRX3      | 6.90E-21  | 18.51 | 1.49E-20  | 16.55 | 2.71E-20  | 15.23 | 1.31E-21  | 23.90 |
| IRX3      | 6.90E-21  | 18.51 | 1.49E-20  | 16.55 | 2.71E-20  | 15.23 | 1.31E-21  | 23.90 |
| IRX3      | 6.90E-21  | 18.51 | 1.49E-20  | 16.55 | 2.71E-20  | 15.23 | 1.31E-21  | 23.90 |
| HLA-DRB1  | 0.042302  | 1.12  | 7.30E-07  | 1.47  | 0.0246396 | 1.14  | 5.83E-10  | 1.82  |
| GAS6      | 2.70E-16  | 3.45  | 8.56E-18  | 4.38  | 7.40E-18  | 4.43  | 1.92E-20  | 7.51  |
| DACT2     | 2.23E-06  | 1.32  | 6.91E-10  | 1.60  | 0.0280786 | 1.11  | 5.35E-09  | 1.52  |
| PUNC      | 0.0829082 | -1.12 | 1.20E-08  | 1.75  | 3.18E-07  | 1.58  | 7.43E-13  | 2.65  |
| PUNC      | 0.0829082 | -1.12 | 1.20E-08  | 1.75  | 3.18E-07  | 1.58  | 7.43E-13  | 2.65  |
| PUNC      | 0.0829082 | -1.12 | 1.20E-08  | 1.75  | 3.18E-07  | 1.58  | 7.43E-13  | 2.65  |
| C10ORF82  | 1.65E-09  | 1.50  | 3.25E-15  | 2.30  | 3.94E-10  | 1.55  | 1.85E-13  | 1.96  |
| DIRC2     | 6.72E-08  | 1.48  | 6.95E-08  | 1.48  | 5.83E-10  | 1.69  | 1.50E-06  | 1.38  |
| KIF13B    | 8.62E-05  | 1.31  | 2.95E-12  | 2.25  | 1.48E-07  | 1.54  | 1.97E-12  | 2.29  |
| KIF13B    | 8.62E-05  | 1.31  | 2.95E-12  | 2.25  | 1.48E-07  | 1.54  | 1.97E-12  | 2.29  |
| KIF13B    | 8.62E-05  | 1.31  | 2.95E-12  | 2.25  | 1.48E-07  | 1.54  | 1.97E-12  | 2.29  |
| CHMP4C    | 0.0120787 | -1.19 | 0.0122936 | -1.19 | 0.242767  | 1.08  | 0.281238  | -1.07 |
| GADD45A   | 0.0556865 | 1.13  | 4.18E-05  | 1.38  | 8.47E-07  | 1.54  | 0.0021504 | 1.24  |
| HS.552096 | 0.832712  | -1.02 | 0.412108  | -1.07 | 4.37E-08  | 1.93  | 4.17E-05  | 1.49  |
| ST3GAL1   | 5.80E-12  | -1.94 | 4.17E-06  | -1.34 | 0.0008564 | 1.20  | 0.0053598 | -1.16 |
| ST3GAL1   | 5.80E-12  | -1.94 | 4.17E-06  | -1.34 | 0.0008564 | 1.20  | 0.0053598 | -1.16 |
| GRAMD3    | 0.566629  | -1.05 | 0.227454  | 1.12  | 0.117682  | 1.16  | 0.0225899 | 1.25  |

**TABLE 1**  
PIP Signature

|           |           |       |           |       |           |       |           |       |
|-----------|-----------|-------|-----------|-------|-----------|-------|-----------|-------|
| HS.573834 | 9.15E-08  | 1.99  | 2.84E-05  | 1.58  | 0.0429653 | 1.20  | 4.10E-08  | 2.06  |
| SMTNL2    | 3.35E-05  | 1.40  | 4.28E-13  | 2.86  | 1.85E-09  | 1.93  | 5.34E-12  | 2.50  |
| CCK       | 0.397981  | 1.04  | 0.0010843 | -1.20 | 1.14E-10  | 1.79  | 4.12E-08  | 1.51  |
| SLCO2A1   | 0.0005269 | 1.27  | 0.0027511 | 1.22  | 1.38E-10  | 1.98  | 7.16E-10  | 1.86  |
| SLCO2A1   | 0.0005269 | 1.27  | 0.0027511 | 1.22  | 1.38E-10  | 1.98  | 7.16E-10  | 1.86  |
| LOC643431 | 0.0460189 | 1.21  | 0.0001323 | 1.52  | 6.16E-09  | 2.35  | 1.13E-06  | 1.84  |
| LOC643431 | 0.0460189 | 1.21  | 0.0001323 | 1.52  | 6.16E-09  | 2.35  | 1.13E-06  | 1.84  |
| LOC643431 | 0.0460189 | 1.21  | 0.0001323 | 1.52  | 6.16E-09  | 2.35  | 1.13E-06  | 1.84  |
| TGM1      | 0.0197348 | 1.16  | 4.78E-06  | 1.44  | 7.84E-09  | 1.75  | 2.12E-07  | 1.58  |
| DDC       | 0.800185  | 1.02  | 0.490699  | 1.06  | 3.79E-07  | 1.90  | 0.0007621 | 1.41  |
| MYF6      | 0.123268  | 1.16  | 0.0028162 | 1.38  | 0.0001948 | 1.53  | 1.28E-06  | 1.89  |
| SCGN      | 0.0029612 | -1.24 | 0.0330874 | -1.15 | 2.43E-13  | 2.89  | 0.0040235 | 1.23  |
| VGLL2     | 0.0043999 | -1.16 | 0.0791666 | -1.09 | 1.15E-13  | 2.27  | 0.0120235 | 1.14  |
| FOXI2     | 0.0305373 | -1.15 | 0.0109315 | -1.19 | 1.35E-09  | 1.91  | 4.09E-09  | 1.83  |
| ASNS      | 6.14E-06  | -1.44 | 0.235584  | -1.08 | 0.0229377 | 1.16  | 0.38892   | 1.05  |
| KLK12     | 0.109426  | -1.13 | 6.30E-05  | 1.45  | 3.38E-10  | 2.31  | 0.102092  | 1.13  |
| KLK12     | 0.109426  | -1.13 | 6.30E-05  | 1.45  | 3.38E-10  | 2.31  | 0.102092  | 1.13  |
| TYRP1     | 0.803248  | 1.02  | 0.0414069 | 1.15  | 0.28031   | 1.07  | 5.15E-07  | 1.58  |
| RAP2C     | 0.86653   | 1.01  | 0.0005388 | 1.23  | 0.000797  | 1.22  | 0.0069823 | 1.16  |
| LOC130576 | 0.158364  | 1.12  | 2.89E-06  | 1.67  | 1.62E-12  | 3.38  | 2.06E-11  | 2.89  |
| LOC130576 | 0.158364  | 1.12  | 2.89E-06  | 1.67  | 1.62E-12  | 3.38  | 2.06E-11  | 2.89  |
| TRIM17    | 0.236658  | 1.08  | 0.0263468 | 1.15  | 4.57E-07  | 1.55  | 2.98E-05  | 1.38  |
| S100A14   | 0.0894807 | 1.14  | 0.0194134 | 1.21  | 3.19E-07  | 1.76  | 5.61E-05  | 1.47  |
| HS.559234 | 1.58E-07  | 1.55  | 4.26E-07  | 1.51  | 0.0010947 | 1.24  | 2.32E-11  | 2.10  |
| HS.568924 | 8.12E-06  | 1.45  | 5.90E-06  | 1.46  | 1.30E-05  | 1.43  | 3.65E-05  | 1.39  |
| RHBDF1    | 1.12E-06  | -1.66 | 0.178274  | 1.11  | 4.13E-05  | -1.47 | 0.522235  | 1.05  |
| DNASE2    | 9.82E-08  | 1.72  | 4.72E-06  | 1.52  | 6.24E-05  | 1.40  | 3.88E-08  | 1.78  |
| LOC340598 | 0.0018876 | -1.31 | 0.0419494 | 1.18  | 6.23E-08  | 1.87  | 0.0154951 | 1.22  |
| LOC340598 | 0.0018876 | -1.31 | 0.0419494 | 1.18  | 6.23E-08  | 1.87  | 0.0154951 | 1.22  |
| C19ORF10  | 0.958437  | 1.01  | 0.8211    | -1.03 | 0.0030791 | 1.46  | 0.514915  | -1.08 |
| KCTD12    | 4.91E-09  | -1.89 | 4.61E-07  | -1.61 | 0.0113374 | 1.20  | 0.0442133 | -1.15 |
| KCTD12    | 4.91E-09  | -1.89 | 4.61E-07  | -1.61 | 0.0113374 | 1.20  | 0.0442133 | -1.15 |
| TMC4      | 0.0001249 | 1.31  | 1.95E-06  | 1.46  | 0.0007244 | 1.26  | 2.05E-09  | 1.80  |
| C20ORF151 | 4.97E-06  | 1.41  | 1.04E-10  | 1.96  | 1.52E-12  | 2.33  | 1.39E-07  | 1.55  |
| ECHDC2    | 1.12E-11  | 2.33  | 1.02E-12  | 2.62  | 3.88E-06  | 1.47  | 5.36E-13  | 2.71  |
| HS.550404 | 3.78E-05  | 1.29  | 0.0005718 | 1.22  | 4.06E-11  | 1.86  | 3.07E-07  | 1.44  |
| LYPD6     | 0.95517   | 1.00  | 7.97E-06  | 1.26  | 1.02E-13  | 1.99  | 2.18E-15  | 2.32  |
| LYPD6     | 0.95517   | 1.00  | 7.97E-06  | 1.26  | 1.02E-13  | 1.99  | 2.18E-15  | 2.32  |
| BMF       | 1.18E-07  | 1.47  | 1.05E-09  | 1.68  | 4.75E-13  | 2.21  | 2.91E-13  | 2.26  |
| PTGS2     | 0.0050603 | -1.17 | 0.186413  | 1.07  | 6.26E-11  | 1.87  | 0.427921  | 1.04  |
| CYP1B1    | 3.33E-05  | 1.44  | 1.44E-11  | 2.56  | 2.82E-18  | 8.29  | 1.92E-12  | 2.85  |
| UPK2      | 2.27E-05  | 1.37  | 1.22E-11  | 2.21  | 1.11E-06  | 1.49  | 5.82E-05  | 1.34  |
| RIPK4     | 2.18E-07  | 1.61  | 1.43E-09  | 1.92  | 5.07E-10  | 2.00  | 1.82E-09  | 1.90  |
| RIPK4     | 2.18E-07  | 1.61  | 1.43E-09  | 1.92  | 5.07E-10  | 2.00  | 1.82E-09  | 1.90  |
| STRA6     | 0.0017939 | 1.19  | 1.00E-08  | 1.58  | 2.64E-12  | 2.08  | 1.27E-09  | 1.68  |
| HS.374257 | 1.03E-08  | -1.83 | 0.00035   | -1.32 | 0.0012868 | 1.27  | 0.005826  | -1.22 |
| HS.374257 | 1.03E-08  | -1.83 | 0.00035   | -1.32 | 0.0012868 | 1.27  | 0.005826  | -1.22 |
| STAP2     | 0.0207958 | 1.12  | 1.30E-08  | 1.51  | 1.71E-09  | 1.59  | 5.78E-09  | 1.54  |
| STAP2     | 0.0207958 | 1.12  | 1.30E-08  | 1.51  | 1.71E-09  | 1.59  | 5.78E-09  | 1.54  |
| STAP2     | 0.0207958 | 1.12  | 1.30E-08  | 1.51  | 1.71E-09  | 1.59  | 5.78E-09  | 1.54  |
| GHRL      | 0.0002791 | 1.25  | 2.10E-09  | 1.69  | 1.57E-11  | 2.00  | 0.0062175 | 1.17  |

**TABLE 1**  
**PIP Signature**

|           |           |       |           |      |           |      |           |       |
|-----------|-----------|-------|-----------|------|-----------|------|-----------|-------|
| CYP26C1   | 0.0006956 | 1.27  | 2.07E-05  | 1.39 | 8.28E-09  | 1.75 | 0.0134259 | 1.18  |
| MEOX1     | 0.131262  | 1.10  | 0.0198849 | 1.17 | 3.07E-12  | 2.49 | 6.48E-07  | 1.55  |
| GRHL3     | 4.35E-14  | 2.40  | 1.07E-15  | 2.90 | 1.72E-16  | 3.22 | 4.68E-11  | 1.82  |
| C20ORF82  | 0.0008921 | 1.29  | 0.0001635 | 1.36 | 4.43E-09  | 1.91 | 0.0015141 | 1.27  |
| LOC646723 | 0.121172  | -1.10 | 0.0006145 | 1.28 | 1.60E-09  | 1.90 | 0.0007645 | 1.28  |
| LOC646723 | 0.121172  | -1.10 | 0.0006145 | 1.28 | 1.60E-09  | 1.90 | 0.0007645 | 1.28  |
| LOC646723 | 0.121172  | -1.10 | 0.0006145 | 1.28 | 1.60E-09  | 1.90 | 0.0007645 | 1.28  |
| SYNPR     | 0.0202166 | 1.15  | 4.14E-12  | 2.19 | 0.0177894 | 1.15 | 0.0004226 | 1.26  |
| HS.390250 | 0.233788  | 1.08  | 0.0001653 | 1.33 | 4.20E-05  | 1.38 | 0.0199856 | 1.17  |
| PCOLCE2   | 1.56E-12  | 2.24  | 2.20E-13  | 2.45 | 7.10E-16  | 3.36 | 2.35E-12  | 2.20  |
| PCOLCE2   | 1.56E-12  | 2.24  | 2.20E-13  | 2.45 | 7.10E-16  | 3.36 | 2.35E-12  | 2.20  |
| LOC342897 | 1.27E-10  | 2.28  | 1.25E-15  | 4.64 | 1.72E-13  | 3.27 | 3.02E-14  | 3.67  |
| DSP       | 7.09E-06  | 1.33  | 3.81E-10  | 1.70 | 1.78E-11  | 1.88 | 8.25E-09  | 1.56  |
| RNASE1    | 0.050095  | -1.10 | 1.02E-07  | 1.43 | 0.0072986 | 1.14 | 1.39E-08  | 1.49  |
| ARHGEF19  | 2.85E-06  | 1.36  | 6.77E-14  | 2.38 | 2.43E-07  | 1.44 | 1.76E-07  | 1.45  |
| CFTR      | 0.0729531 | 1.14  | 0.942886  | 1.01 | 1.85E-09  | 2.04 | 6.47E-06  | 1.52  |
| LTB       | 0.14023   | 1.10  | 0.006543  | 1.20 | 9.58E-15  | 3.36 | 5.94E-05  | 1.36  |
| BIK       | 0.0001568 | 1.34  | 0.0076812 | 1.20 | 0.0006043 | 1.29 | 0.614258  | -1.03 |
| TMEM100   | 0.419424  | 1.05  | 0.188628  | 1.08 | 1.73E-08  | 1.67 | 0.829692  | 1.01  |
| STARD10   | 1.14E-07  | 1.61  | 1.01E-11  | 2.28 | 1.34E-09  | 1.87 | 1.52E-12  | 2.49  |
| STARD10   | 1.14E-07  | 1.61  | 1.01E-11  | 2.28 | 1.34E-09  | 1.87 | 1.52E-12  | 2.49  |
| SDC4      | 0.12177   | 1.08  | 1.21E-07  | 1.50 | 2.80E-11  | 1.94 | 1.82E-09  | 1.68  |
| SDC4      | 0.12177   | 1.08  | 1.21E-07  | 1.50 | 2.80E-11  | 1.94 | 1.82E-09  | 1.68  |
| SDC4      | 0.12177   | 1.08  | 1.21E-07  | 1.50 | 2.80E-11  | 1.94 | 1.82E-09  | 1.68  |
| PROM2     | 4.05E-09  | 2.33  | 1.17E-08  | 2.21 | 9.66E-07  | 1.81 | 1.22E-08  | 2.20  |
| PROM2     | 4.05E-09  | 2.33  | 1.17E-08  | 2.21 | 9.66E-07  | 1.81 | 1.22E-08  | 2.20  |
| ATP2C2    | 1.16E-05  | 1.45  | 4.04E-09  | 1.89 | 2.43E-10  | 2.11 | 2.94E-06  | 1.51  |
| LY6E      | 3.66E-09  | 2.06  | 5.09E-13  | 3.29 | 4.35E-11  | 2.55 | 3.27E-10  | 2.30  |
| LY6E      | 3.66E-09  | 2.06  | 5.09E-13  | 3.29 | 4.35E-11  | 2.55 | 3.27E-10  | 2.30  |
| LY6E      | 3.66E-09  | 2.06  | 5.09E-13  | 3.29 | 4.35E-11  | 2.55 | 3.27E-10  | 2.30  |
| EPN3      | 0.0041474 | 1.20  | 2.62E-07  | 1.53 | 5.52E-08  | 1.60 | 5.10E-05  | 1.33  |
| TESK2     | 1.53E-13  | 2.01  | 2.03E-13  | 1.99 | 0.138212  | 1.06 | 1.02E-13  | 2.04  |
| CGN       | 0.0008949 | 1.46  | 1.49E-06  | 1.93 | 0.0006806 | 1.48 | 5.47E-05  | 1.65  |
| HS.517927 | 9.44E-07  | 1.61  | 9.04E-11  | 2.32 | 0.0003129 | 1.35 | 0.0496506 | 1.15  |
| HS.560343 | 7.35E-08  | 1.82  | 3.27E-10  | 2.29 | 8.14E-07  | 1.67 | 1.06E-11  | 2.73  |
| TMEM154   | 0.0952591 | 1.11  | 0.0009083 | 1.26 | 2.83E-07  | 1.57 | 0.0110977 | 1.18  |
| GATA2     | 0.0007169 | 1.24  | 0.0020417 | 1.21 | 2.19E-09  | 1.72 | 3.02E-06  | 1.41  |
| SEPP1     | 8.60E-16  | 4.19  | 3.96E-18  | 6.61 | 1.30E-16  | 4.85 | 1.00E-18  | 7.58  |
| SEPP1     | 8.60E-16  | 4.19  | 3.96E-18  | 6.61 | 1.30E-16  | 4.85 | 1.00E-18  | 7.58  |
| SEPP1     | 8.60E-16  | 4.19  | 3.96E-18  | 6.61 | 1.30E-16  | 4.85 | 1.00E-18  | 7.58  |
| BNIP1     | 1.18E-13  | 2.40  | 1.46E-18  | 4.82 | 1.25E-16  | 3.50 | 1.30E-12  | 2.16  |
| TJP3      | 1.56E-19  | 5.54  | 3.00E-20  | 6.43 | 5.30E-17  | 3.57 | 1.75E-18  | 4.55  |
| TJP3      | 1.56E-19  | 5.54  | 3.00E-20  | 6.43 | 5.30E-17  | 3.57 | 1.75E-18  | 4.55  |
| NFE2      | 9.10E-13  | 2.78  | 1.19E-12  | 2.74 | 3.68E-11  | 2.31 | 6.76E-12  | 2.51  |

**TABLE 2**  
**N-SB Signature**

| Gene name  | N-SB (day 5 versus 1) |       | N-SB (day 7 versus 1) |       | N-SB (day 9 versus 1) |       | N-SB (day 11 versus 1) |       |
|------------|-----------------------|-------|-----------------------|-------|-----------------------|-------|------------------------|-------|
|            | p-value               | FC    | p-value               | FC    | p-value               | FC    | p-value                | FC    |
| LHX2       | 3.66E-15              | 4.55  | 1.60E-23              | 56.65 | 2.85E-24              | 81.63 | 2.39E-24               | 84.91 |
| FABP7      | 4.57E-13              | 2.15  | 2.28E-17              | 3.61  | 3.65E-23              | 12.52 | 1.06E-23               | 14.73 |
| FABP7      | 4.57E-13              | 2.15  | 2.28E-17              | 3.61  | 3.65E-23              | 12.52 | 1.06E-23               | 14.73 |
| FABP7      | 4.57E-13              | 2.15  | 2.28E-17              | 3.61  | 3.65E-23              | 12.52 | 1.06E-23               | 14.73 |
| LIX1       | 3.24E-19              | 5.94  | 3.44E-21              | 9.42  | 3.90E-22              | 12.22 | 1.06E-22               | 14.48 |
| LIX1       | 3.24E-19              | 5.94  | 3.44E-21              | 9.42  | 3.90E-22              | 12.22 | 1.06E-22               | 14.48 |
| LIX1       | 3.24E-19              | 5.94  | 3.44E-21              | 9.42  | 3.90E-22              | 12.22 | 1.06E-22               | 14.48 |
| DACH1      | 0.0079376             | 1.15  | 9.42E-20              | 5.50  | 7.69E-22              | 8.80  | 5.27E-23               | 12.06 |
| WNT5B      | 0.486825              | -1.03 | 7.04E-14              | 2.05  | 1.95E-20              | 4.74  | 8.22E-21               | 5.08  |
| PRSS23     | 0.0245434             | 1.16  | 1.07E-17              | 5.51  | 1.23E-19              | 8.52  | 2.66E-20               | 10.14 |
| PRSS23     | 0.0245434             | 1.16  | 1.07E-17              | 5.51  | 1.23E-19              | 8.52  | 2.66E-20               | 10.14 |
| PRSS23     | 0.0245434             | 1.16  | 1.07E-17              | 5.51  | 1.23E-19              | 8.52  | 2.66E-20               | 10.14 |
| PRSS23     | 0.0245434             | 1.16  | 1.07E-17              | 5.51  | 1.23E-19              | 8.52  | 2.66E-20               | 10.14 |
| HS.71947   | 1.41E-08              | 1.82  | 5.10E-18              | 6.98  | 2.20E-16              | 4.96  | 4.45E-21               | 16.10 |
| HS.71947   | 1.41E-08              | 1.82  | 5.10E-18              | 6.98  | 2.20E-16              | 4.96  | 4.45E-21               | 16.10 |
| ARHGAP15   | 3.63E-14              | 3.43  | 1.06E-14              | 3.73  | 7.82E-19              | 8.56  | 2.72E-20               | 12.76 |
| ARHGAP15   | 3.63E-14              | 3.43  | 1.06E-14              | 3.73  | 7.82E-19              | 8.56  | 2.72E-20               | 12.76 |
| NCALD      | 0.0052426             | 1.15  | 1.66E-10              | 1.69  | 2.73E-21              | 6.88  | 1.21E-21               | 7.46  |
| NCALD      | 0.0052426             | 1.15  | 1.66E-10              | 1.69  | 2.73E-21              | 6.88  | 1.21E-21               | 7.46  |
| NCALD      | 0.0052426             | 1.15  | 1.66E-10              | 1.69  | 2.73E-21              | 6.88  | 1.21E-21               | 7.46  |
| MGC39900   | 4.85E-17              | 2.89  | 7.95E-19              | 3.70  | 9.90E-20              | 4.28  | 1.01E-20               | 5.11  |
| TPBG       | 9.62E-07              | 1.68  | 1.67E-17              | 7.97  | 1.14E-16              | 6.56  | 1.64E-18               | 10.35 |
| ZNF521     | 5.97E-20              | 15.37 | 5.10E-21              | 22.08 | 5.67E-21              | 21.72 | 6.33E-22               | 31.14 |
| ZNF521     | 5.97E-20              | 15.37 | 5.10E-21              | 22.08 | 5.67E-21              | 21.72 | 6.33E-22               | 31.14 |
| ZNF521     | 5.97E-20              | 15.37 | 5.10E-21              | 22.08 | 5.67E-21              | 21.72 | 6.33E-22               | 31.14 |
| ST6GALNAC  | 1.05E-14              | 3.04  | 8.23E-18              | 5.00  | 6.04E-21              | 10.19 | 1.25E-19               | 7.32  |
| TMEM88     | 6.40E-19              | 4.38  | 3.72E-20              | 5.51  | 1.49E-18              | 4.12  | 6.35E-21               | 6.46  |
| DLL1       | 3.63E-20              | 4.59  | 5.22E-25              | 14.49 | 2.99E-24              | 11.57 | 1.23E-26               | 25.20 |
| DLL1       | 3.63E-20              | 4.59  | 5.22E-25              | 14.49 | 2.99E-24              | 11.57 | 1.23E-26               | 25.20 |
| ZFHX4      | 1.87E-11              | 3.47  | 1.30E-16              | 10.34 | 9.65E-18              | 14.44 | 2.33E-18               | 17.65 |
| MAP2       | 9.44E-14              | 2.79  | 6.17E-17              | 4.50  | 1.69E-17              | 5.00  | 7.66E-21               | 10.79 |
| MAP2       | 9.44E-14              | 2.79  | 6.17E-17              | 4.50  | 1.69E-17              | 5.00  | 7.66E-21               | 10.79 |
| EPB41L5    | 6.40E-16              | 2.70  | 1.54E-16              | 2.91  | 1.76E-17              | 3.30  | 2.28E-20               | 5.34  |
| FGF9       | 2.06E-07              | 1.66  | 7.92E-13              | 2.86  | 4.09E-17              | 5.82  | 1.11E-18               | 8.31  |
| FGF9       | 2.06E-07              | 1.66  | 7.92E-13              | 2.86  | 4.09E-17              | 5.82  | 1.11E-18               | 8.31  |
| FGF9       | 2.06E-07              | 1.66  | 7.92E-13              | 2.86  | 4.09E-17              | 5.82  | 1.11E-18               | 8.31  |
| NELL2      | 3.77E-07              | 1.38  | 4.16E-12              | 1.87  | 1.18E-13              | 2.14  | 1.53E-18               | 3.89  |
| NELL2      | 3.77E-07              | 1.38  | 4.16E-12              | 1.87  | 1.18E-13              | 2.14  | 1.53E-18               | 3.89  |
| DKFZP586H2 | 9.94E-25              | 13.95 | 2.10E-26              | 24.49 | 1.21E-24              | 13.59 | 1.22E-24               | 13.57 |
| ZEB2       | 2.59E-14              | 3.74  | 7.40E-16              | 4.90  | 7.06E-15              | 4.11  | 9.50E-17               | 5.85  |
| ZEB2       | 2.59E-14              | 3.74  | 7.40E-16              | 4.90  | 7.06E-15              | 4.11  | 9.50E-17               | 5.85  |
| ZEB2       | 2.59E-14              | 3.74  | 7.40E-16              | 4.90  | 7.06E-15              | 4.11  | 9.50E-17               | 5.85  |
| SFRP2      | 0.306511              | -1.07 | 5.36E-05              | 1.39  | 2.73E-10              | 2.09  | 9.94E-13               | 2.73  |
| SFRP2      | 0.306511              | -1.07 | 5.36E-05              | 1.39  | 2.73E-10              | 2.09  | 9.94E-13               | 2.73  |
| TSHZ2      | 0.0017062             | 1.32  | 1.64E-11              | 2.80  | 3.38E-14              | 4.21  | 6.46E-17               | 7.31  |
| TSHZ2      | 0.0017062             | 1.32  | 1.64E-11              | 2.80  | 3.38E-14              | 4.21  | 6.46E-17               | 7.31  |
| ENC1       | 1.97E-15              | 4.11  | 2.08E-18              | 7.48  | 7.79E-21              | 14.47 | 1.68E-13               | 3.06  |
| CDH11      | 0.0018493             | 1.41  | 1.33E-08              | 2.41  | 1.19E-13              | 5.44  | 4.46E-14               | 5.96  |
| CDH11      | 0.0018493             | 1.41  | 1.33E-08              | 2.41  | 1.19E-13              | 5.44  | 4.46E-14               | 5.96  |

**TABLE 2**  
**N-SB Signature**

|           |           |       |           |       |           |       |           |       |
|-----------|-----------|-------|-----------|-------|-----------|-------|-----------|-------|
| CDH11     | 0.0018493 | 1.41  | 1.33E-08  | 2.41  | 1.19E-13  | 5.44  | 4.46E-14  | 5.96  |
| LPHN3     | 0.305798  | 1.05  | 2.00E-10  | 1.79  | 6.18E-11  | 1.86  | 4.46E-16  | 3.21  |
| LPHN3     | 0.305798  | 1.05  | 2.00E-10  | 1.79  | 6.18E-11  | 1.86  | 4.46E-16  | 3.21  |
| HIST1H2BK | 0.0536865 | -1.09 | 0.0017674 | 1.17  | 2.08E-15  | 2.60  | 1.27E-14  | 2.39  |
| HES5      | 0.425011  | 1.09  | 0.005797  | 1.38  | 2.91E-18  | 24.18 | 5.70E-20  | 48.94 |
| HES5      | 0.425011  | 1.09  | 0.005797  | 1.38  | 2.91E-18  | 24.18 | 5.70E-20  | 48.94 |
| HES5      | 0.425011  | 1.09  | 0.005797  | 1.38  | 2.91E-18  | 24.18 | 5.70E-20  | 48.94 |
| IL17RD    | 1.25E-15  | -4.14 | 6.04E-09  | -1.84 | 0.0056793 | -1.22 | 0.83053   | 1.01  |
| LOC728715 | 7.32E-12  | 2.72  | 3.02E-19  | 11.38 | 7.70E-17  | 6.25  | 9.84E-16  | 4.98  |
| ETV5      | 3.44E-13  | -3.22 | 0.0002247 | -1.37 | 1.29E-09  | 2.10  | 0.0002489 | 1.37  |
| ETV5      | 3.44E-13  | -3.22 | 0.0002247 | -1.37 | 1.29E-09  | 2.10  | 0.0002489 | 1.37  |
| ACTA2     | 1.70E-10  | 1.79  | 4.47E-09  | 1.62  | 8.10E-22  | 9.68  | 4.04E-19  | 5.25  |
| TAGLN3    | 0.683794  | 1.03  | 0.0011005 | 1.30  | 1.03E-08  | 1.90  | 1.31E-16  | 5.65  |
| TAGLN3    | 0.683794  | 1.03  | 0.0011005 | 1.30  | 1.03E-08  | 1.90  | 1.31E-16  | 5.65  |
| TAGLN3    | 0.683794  | 1.03  | 0.0011005 | 1.30  | 1.03E-08  | 1.90  | 1.31E-16  | 5.65  |
| HIST1H1D  | 1.99E-08  | 1.83  | 8.13E-12  | 2.57  | 9.46E-13  | 2.89  | 1.45E-14  | 3.77  |
| FEZ1      | 2.13E-23  | 9.34  | 4.18E-22  | 6.84  | 3.67E-19  | 3.92  | 9.68E-21  | 5.16  |
| FEZ1      | 2.13E-23  | 9.34  | 4.18E-22  | 6.84  | 3.67E-19  | 3.92  | 9.68E-21  | 5.16  |
| FEZ1      | 2.13E-23  | 9.34  | 4.18E-22  | 6.84  | 3.67E-19  | 3.92  | 9.68E-21  | 5.16  |
| ANGPTL4   | 1.77E-13  | 1.91  | 2.12E-10  | 1.55  | 1.26E-17  | 2.90  | 3.85E-14  | 2.02  |
| DYRK3     | 9.06E-06  | 1.28  | 0.0477767 | 1.09  | 2.19E-09  | 1.54  | 5.01E-09  | 1.50  |
| FGFRL1    | 1.60E-13  | -2.77 | 7.25E-11  | -2.08 | 0.00127   | -1.25 | 0.0001004 | -1.33 |
| HECTD2    | 1.30E-06  | 1.34  | 1.89E-11  | 1.78  | 6.21E-13  | 2.00  | 9.42E-14  | 2.15  |
| HS.61257  | 0.79654   | -1.02 | 2.50E-08  | 1.83  | 2.88E-05  | 1.44  | 7.71E-13  | 2.97  |
| GPR56     | 4.61E-11  | 2.53  | 1.24E-16  | 6.29  | 1.70E-16  | 6.11  | 2.75E-17  | 7.30  |
| GPR56     | 4.61E-11  | 2.53  | 1.24E-16  | 6.29  | 1.70E-16  | 6.11  | 2.75E-17  | 7.30  |
| NEUROG2   | 0.453939  | 1.10  | 7.67E-13  | 6.66  | 7.84E-05  | 1.80  | 6.00E-14  | 8.77  |
| NEUROG2   | 0.453939  | 1.10  | 7.67E-13  | 6.66  | 7.84E-05  | 1.80  | 6.00E-14  | 8.77  |
| NEUROG2   | 0.453939  | 1.10  | 7.67E-13  | 6.66  | 7.84E-05  | 1.80  | 6.00E-14  | 8.77  |
| FRZB      | 1.08E-20  | 28.05 | 4.51E-21  | 32.59 | 2.89E-21  | 35.26 | 1.19E-19  | 19.15 |
| FRZB      | 1.08E-20  | 28.05 | 4.51E-21  | 32.59 | 2.89E-21  | 35.26 | 1.19E-19  | 19.15 |
| FRZB      | 1.08E-20  | 28.05 | 4.51E-21  | 32.59 | 2.89E-21  | 35.26 | 1.19E-19  | 19.15 |
| VASH1     | 1.10E-07  | 1.81  | 7.03E-09  | 2.02  | 1.12E-09  | 2.20  | 1.93E-13  | 3.56  |
| RTN1      | 8.11E-09  | 1.55  | 2.51E-14  | 2.44  | 3.03E-09  | 1.59  | 9.59E-14  | 2.29  |
| RNF165    | 8.09E-06  | 1.57  | 2.04E-12  | 3.13  | 5.85E-11  | 2.58  | 1.84E-14  | 4.33  |
| RNF165    | 8.09E-06  | 1.57  | 2.04E-12  | 3.13  | 5.85E-11  | 2.58  | 1.84E-14  | 4.33  |
| SCUBE1    | 0.0010775 | 1.26  | 8.99E-14  | 2.95  | 2.20E-15  | 3.72  | 8.69E-14  | 2.96  |
| LRP2      | 4.31E-08  | 1.78  | 2.20E-10  | 2.20  | 3.74E-11  | 2.39  | 6.35E-14  | 3.43  |
| SIX3      | 2.19E-15  | 8.68  | 1.46E-16  | 12.00 | 2.55E-13  | 5.38  | 5.99E-12  | 4.13  |
| NLGN1     | 9.13E-05  | -1.38 | 0.195948  | 1.09  | 6.78E-07  | 1.60  | 9.87E-11  | 2.25  |
| NLGN1     | 9.13E-05  | -1.38 | 0.195948  | 1.09  | 6.78E-07  | 1.60  | 9.87E-11  | 2.25  |
| NLGN1     | 9.13E-05  | -1.38 | 0.195948  | 1.09  | 6.78E-07  | 1.60  | 9.87E-11  | 2.25  |
| P4HA1     | 0.0233116 | 1.19  | 0.759342  | -1.02 | 0.0013103 | -1.30 | 1.09E-06  | 1.61  |
| C4ORF31   | 1.99E-10  | 1.83  | 8.83E-12  | 2.05  | 7.96E-10  | 1.74  | 3.72E-14  | 2.61  |
| SLC6A16   | 5.18E-08  | 2.15  | 1.18E-12  | 4.13  | 3.99E-12  | 3.77  | 7.68E-16  | 8.06  |
| BTG2      | 8.50E-10  | 2.01  | 3.97E-12  | 2.58  | 1.28E-13  | 3.12  | 5.86E-14  | 3.27  |
| ME3       | 8.58E-06  | 1.28  | 4.05E-10  | 1.61  | 1.53E-14  | 2.29  | 5.10E-14  | 2.17  |
| ME3       | 8.58E-06  | 1.28  | 4.05E-10  | 1.61  | 1.53E-14  | 2.29  | 5.10E-14  | 2.17  |
| ME3       | 8.58E-06  | 1.28  | 4.05E-10  | 1.61  | 1.53E-14  | 2.29  | 5.10E-14  | 2.17  |
| TH        | 0.000237  | -1.19 | 0.0491056 | -1.09 | 2.36E-10  | 1.59  | 1.66E-10  | 1.60  |
| SYT11     | 0.285311  | 1.09  | 7.53E-06  | 1.61  | 6.81E-10  | 2.38  | 6.03E-11  | 2.71  |

**TABLE 2**  
**N-SB Signature**

|           |           |       |           |       |           |       |           |       |
|-----------|-----------|-------|-----------|-------|-----------|-------|-----------|-------|
| TMEM74    | 7.45E-07  | 1.49  | 4.35E-14  | 2.86  | 6.77E-17  | 4.35  | 1.63E-12  | 2.38  |
| LPAR4     | 1.17E-05  | 1.42  | 0.0232763 | 1.16  | 1.90E-07  | 1.60  | 1.38E-11  | 2.28  |
| LPAR4     | 1.17E-05  | 1.42  | 0.0232763 | 1.16  | 1.90E-07  | 1.60  | 1.38E-11  | 2.28  |
| HS.181245 | 2.14E-16  | 5.93  | 2.57E-18  | 9.32  | 4.63E-18  | 8.73  | 1.17E-17  | 7.89  |
| EFNB1     | 4.66E-15  | 3.44  | 9.74E-17  | 4.52  | 8.15E-18  | 5.55  | 4.91E-17  | 4.77  |
| EFNB1     | 4.66E-15  | 3.44  | 9.74E-17  | 4.52  | 8.15E-18  | 5.55  | 4.91E-17  | 4.77  |
| LOC648149 | 1.40E-06  | 1.61  | 8.94E-12  | 2.66  | 4.66E-14  | 3.66  | 3.20E-15  | 4.45  |
| LOC648149 | 1.40E-06  | 1.61  | 8.94E-12  | 2.66  | 4.66E-14  | 3.66  | 3.20E-15  | 4.45  |
| CA2       | 0.0044311 | -1.17 | 0.0306647 | 1.12  | 2.10E-12  | 2.13  | 0.0004862 | 1.23  |
| CA2       | 0.0044311 | -1.17 | 0.0306647 | 1.12  | 2.10E-12  | 2.13  | 0.0004862 | 1.23  |
| HS.13438  | 6.97E-09  | 1.72  | 1.09E-11  | 2.19  | 1.66E-14  | 3.03  | 1.03E-13  | 2.74  |
| SOX3      | 8.69E-09  | -2.06 | 0.0063006 | -1.26 | 0.0012553 | -1.33 | 8.09E-07  | 1.71  |
| SOX3      | 8.69E-09  | -2.06 | 0.0063006 | -1.26 | 0.0012553 | -1.33 | 8.09E-07  | 1.71  |
| C8ORF4    | 0.168816  | -1.08 | 0.0001632 | 1.30  | 5.33E-08  | 1.61  | 5.35E-12  | 2.27  |
| CTNNBIP1  | 5.35E-06  | 1.49  | 1.33E-13  | 3.09  | 6.12E-15  | 3.77  | 5.61E-15  | 3.79  |
| CTNNBIP1  | 5.35E-06  | 1.49  | 1.33E-13  | 3.09  | 6.12E-15  | 3.77  | 5.61E-15  | 3.79  |
| HS.493947 | 0.0001233 | 1.35  | 5.03E-05  | 1.38  | 0.536754  | 1.04  | 1.18E-09  | 1.95  |
| CAPN6     | 2.88E-12  | 1.93  | 1.33E-15  | 2.68  | 5.41E-13  | 2.05  | 6.48E-12  | 1.87  |
| CAPN6     | 2.88E-12  | 1.93  | 1.33E-15  | 2.68  | 5.41E-13  | 2.05  | 6.48E-12  | 1.87  |
| GLT25D2   | 0.0055039 | -1.26 | 0.0220138 | 1.21  | 6.97E-09  | 2.05  | 1.55E-10  | 2.46  |
| GLT25D2   | 0.0055039 | -1.26 | 0.0220138 | 1.21  | 6.97E-09  | 2.05  | 1.55E-10  | 2.46  |
| GLT25D2   | 0.0055039 | -1.26 | 0.0220138 | 1.21  | 6.97E-09  | 2.05  | 1.55E-10  | 2.46  |
| PDLIM7    | 0.020155  | -1.20 | 0.0175343 | 1.20  | 1.17E-08  | 1.92  | 3.64E-10  | 2.23  |
| HIST1H2BD | 0.388283  | -1.05 | 0.0985281 | -1.10 | 0.0001052 | 1.29  | 1.57E-11  | 2.05  |
| CNTNAP1   | 3.85E-14  | 3.91  | 7.11E-17  | 6.62  | 8.00E-13  | 3.19  | 3.31E-17  | 7.15  |
| SORCS2    | 1.39E-09  | 2.85  | 1.31E-12  | 4.68  | 6.70E-14  | 6.11  | 2.87E-13  | 5.34  |
| SORCS2    | 1.39E-09  | 2.85  | 1.31E-12  | 4.68  | 6.70E-14  | 6.11  | 2.87E-13  | 5.34  |
| MAMDC2    | 1.07E-07  | -1.79 | 1.06E-09  | -2.16 | 0.940842  | 1.01  | 1.64E-06  | 1.62  |
| ARRDC4    | 1.84E-12  | 3.74  | 3.65E-13  | 4.22  | 0.0001316 | 1.51  | 2.07E-15  | 6.62  |
| SC65      | 0.0002747 | 1.27  | 3.02E-07  | 1.50  | 3.70E-08  | 1.59  | 1.72E-10  | 1.89  |
| HS.4892   | 2.81E-11  | 3.19  | 6.14E-10  | 2.65  | 6.91E-10  | 2.63  | 6.26E-11  | 3.03  |
| MFNG      | 2.70E-13  | 3.02  | 7.09E-17  | 5.48  | 4.28E-15  | 3.96  | 1.45E-15  | 4.29  |
| MFNG      | 2.70E-13  | 3.02  | 7.09E-17  | 5.48  | 4.28E-15  | 3.96  | 1.45E-15  | 4.29  |
| PLEKHA1   | 7.56E-08  | 1.55  | 6.80E-09  | 1.66  | 0.0006633 | 1.24  | 9.22E-12  | 2.10  |
| COL11A1   | 3.00E-16  | -3.05 | 4.30E-14  | -2.36 | 1.80E-06  | -1.36 | 0.0002234 | 1.23  |
| COL11A1   | 3.00E-16  | -3.05 | 4.30E-14  | -2.36 | 1.80E-06  | -1.36 | 0.0002234 | 1.23  |
| COL11A1   | 3.00E-16  | -3.05 | 4.30E-14  | -2.36 | 1.80E-06  | -1.36 | 0.0002234 | 1.23  |
| ROBO1     | 2.81E-07  | 1.51  | 1.56E-08  | 1.64  | 3.76E-05  | 1.33  | 1.52E-08  | 1.64  |
| LOC654096 | 0.548272  | 1.04  | 4.99E-06  | 1.47  | 1.29E-08  | 1.77  | 1.58E-11  | 2.32  |
| LOC654096 | 0.548272  | 1.04  | 4.99E-06  | 1.47  | 1.29E-08  | 1.77  | 1.58E-11  | 2.32  |
| FJX1      | 1.29E-14  | 3.19  | 4.58E-17  | 4.73  | 5.50E-15  | 3.36  | 3.89E-09  | 1.78  |
| FJX1      | 1.29E-14  | 3.19  | 4.58E-17  | 4.73  | 5.50E-15  | 3.36  | 3.89E-09  | 1.78  |
| C18ORF26  | 5.30E-09  | 1.83  | 1.43E-06  | 1.52  | 1.91E-07  | -1.62 | 0.009866  | -1.19 |
| C18ORF26  | 5.30E-09  | 1.83  | 1.43E-06  | 1.52  | 1.91E-07  | -1.62 | 0.009866  | -1.19 |
| C18ORF26  | 5.30E-09  | 1.83  | 1.43E-06  | 1.52  | 1.91E-07  | -1.62 | 0.009866  | -1.19 |
| LOC653527 | 0.0275281 | 1.16  | 0.000253  | 1.32  | 6.04E-09  | 1.83  | 4.33E-11  | 2.23  |
| LOC653527 | 0.0275281 | 1.16  | 0.000253  | 1.32  | 6.04E-09  | 1.83  | 4.33E-11  | 2.23  |
| MAP6      | 2.48E-08  | 1.38  | 0.0100869 | 1.11  | 4.78E-06  | 1.25  | 2.91E-11  | 1.62  |
| MAP6      | 2.48E-08  | 1.38  | 0.0100869 | 1.11  | 4.78E-06  | 1.25  | 2.91E-11  | 1.62  |
| APLP1     | 0.0003107 | 1.65  | 7.74E-08  | 2.57  | 4.58E-08  | 2.66  | 3.53E-10  | 3.70  |
| PLVAP     | 0.093409  | 1.16  | 0.0219332 | 1.23  | 0.0873396 | 1.16  | 3.35E-10  | 2.55  |

**TABLE 2**  
**N-SB Signature**

|           |           |       |           |       |           |       |           |       |
|-----------|-----------|-------|-----------|-------|-----------|-------|-----------|-------|
| OPN1SW    | 0.748992  | -1.02 | 0.0486637 | 1.17  | 0.302184  | 1.08  | 1.15E-08  | 1.97  |
| PLP1      | 0.0048185 | -1.12 | 6.07E-08  | -1.36 | 0.0247094 | 1.09  | 5.16E-08  | 1.37  |
| DKKL1     | 8.91E-06  | 1.32  | 9.36E-11  | 1.79  | 1.14E-08  | 1.55  | 1.01E-09  | 1.66  |
| NOS2A     | 0.894773  | 1.01  | 0.239392  | 1.14  | 4.57E-07  | 2.15  | 2.81E-10  | 3.33  |
| LOC728411 | 2.57E-08  | 2.17  | 9.32E-09  | 2.28  | 5.18E-07  | 1.89  | 2.29E-12  | 3.74  |
| GNE       | 1.31E-07  | -1.55 | 0.234816  | 1.07  | 0.0244454 | -1.14 | 0.0002286 | 1.28  |
| GCUD2     | 1.38E-05  | 1.31  | 1.59E-05  | 1.30  | 8.75E-07  | -1.39 | 0.0117945 | 1.14  |
| KIAA0367  | 0.0040977 | 1.16  | 1.25E-06  | 1.38  | 0.303755  | -1.05 | 1.24E-10  | 1.76  |
| LRRRC4C   | 1.89E-08  | 1.78  | 1.26E-11  | 2.42  | 6.46E-06  | 1.48  | 4.98E-11  | 2.27  |
| PRRT2     | 1.06E-11  | 5.50  | 1.15E-14  | 11.64 | 1.92E-11  | 5.20  | 1.62E-14  | 11.15 |
| CCKBR     | 0.340591  | 1.06  | 9.10E-08  | 1.62  | 7.24E-15  | 3.36  | 0.0003768 | 1.29  |
| C6ORF126  | 2.24E-07  | 1.69  | 4.74E-12  | 2.69  | 0.0092863 | 1.22  | 0.0023194 | 1.27  |
| C6ORF126  | 2.24E-07  | 1.69  | 4.74E-12  | 2.69  | 0.0092863 | 1.22  | 0.0023194 | 1.27  |
| NECAB2    | 1.41E-10  | 2.32  | 4.71E-14  | 3.67  | 9.48E-15  | 4.12  | 1.10E-14  | 4.07  |
| FEZF1     | 8.14E-15  | 4.74  | 2.85E-16  | 6.37  | 5.86E-13  | 3.46  | 9.49E-12  | 2.91  |
| FEZF1     | 8.14E-15  | 4.74  | 2.85E-16  | 6.37  | 5.86E-13  | 3.46  | 9.49E-12  | 2.91  |
| RRAS      | 0.204321  | 1.09  | 1.81E-06  | 1.54  | 0.0094212 | 1.20  | 8.20E-09  | 1.84  |
| RBM24     | 2.33E-10  | 2.30  | 7.40E-10  | 2.18  | 0.0001702 | 1.39  | 9.45E-13  | 3.09  |
| RBM24     | 2.33E-10  | 2.30  | 7.40E-10  | 2.18  | 0.0001702 | 1.39  | 9.45E-13  | 3.09  |
| RBM24     | 2.33E-10  | 2.30  | 7.40E-10  | 2.18  | 0.0001702 | 1.39  | 9.45E-13  | 3.09  |
| SEMA5A    | 7.09E-06  | 1.47  | 5.19E-06  | 1.48  | 1.15E-06  | 1.55  | 3.77E-12  | 2.54  |
| MVP       | 9.57E-08  | 1.58  | 1.23E-14  | 3.07  | 1.54E-05  | 1.38  | 9.48E-16  | 3.60  |
| LOC285382 | 2.16E-10  | 1.65  | 1.00E-05  | 1.29  | 1.08E-11  | 1.81  | 1.67E-08  | 1.47  |
| FGF8      | 0.399675  | -1.09 | 2.48E-11  | 3.78  | 7.22E-14  | 6.19  | 5.49E-09  | 2.65  |
| FGF8      | 0.399675  | -1.09 | 2.48E-11  | 3.78  | 7.22E-14  | 6.19  | 5.49E-09  | 2.65  |
| ADA       | 0.0006078 | 1.27  | 2.13E-06  | 1.47  | 0.0001441 | 1.31  | 4.86E-06  | 1.43  |
| ADA       | 0.0006078 | 1.27  | 2.13E-06  | 1.47  | 0.0001441 | 1.31  | 4.86E-06  | 1.43  |
| ADA       | 0.0006078 | 1.27  | 2.13E-06  | 1.47  | 0.0001441 | 1.31  | 4.86E-06  | 1.43  |
| ZEB1      | 0.200116  | 1.08  | 0.247314  | 1.07  | 0.0319099 | 1.14  | 1.55E-08  | 1.70  |
| TTYH1     | 1.58E-13  | 2.62  | 4.01E-14  | 2.82  | 9.28E-17  | 4.15  | 9.30E-17  | 4.15  |
| TTYH1     | 1.58E-13  | 2.62  | 4.01E-14  | 2.82  | 9.28E-17  | 4.15  | 9.30E-17  | 4.15  |
| TMEFF1    | 1.30E-10  | 2.83  | 5.92E-10  | 2.60  | 3.41E-06  | 1.73  | 4.21E-10  | 2.65  |
| CD99L2    | 0.0743925 | 1.15  | 6.74E-06  | 1.56  | 9.13E-09  | 1.99  | 1.14E-09  | 2.18  |
| POU3F2    | 0.286457  | 1.11  | 0.0010651 | 1.42  | 4.30E-05  | 1.61  | 2.15E-08  | 2.26  |
| POU3F2    | 0.286457  | 1.11  | 0.0010651 | 1.42  | 4.30E-05  | 1.61  | 2.15E-08  | 2.26  |
| VIM       | 1.13E-19  | -5.48 | 1.16E-19  | -5.47 | 4.34E-16  | -3.05 | 1.28E-10  | -1.76 |
| VIM       | 1.13E-19  | -5.48 | 1.16E-19  | -5.47 | 4.34E-16  | -3.05 | 1.28E-10  | -1.76 |
| PTGIS     | 1.52E-10  | 2.14  | 1.26E-15  | 4.16  | 4.69E-13  | 2.84  | 6.12E-15  | 3.72  |
| PTGIS     | 1.52E-10  | 2.14  | 1.26E-15  | 4.16  | 4.69E-13  | 2.84  | 6.12E-15  | 3.72  |
| SILV      | 3.22E-17  | 3.15  | 4.65E-19  | 4.15  | 8.01E-17  | 2.99  | 3.46E-17  | 3.13  |
| HS.560863 | 6.94E-15  | 4.74  | 6.19E-17  | 7.30  | 1.87E-15  | 5.30  | 2.50E-09  | 2.16  |
| ARMCX4    | 8.16E-06  | 1.50  | 3.74E-12  | 2.72  | 0.005282  | 1.24  | 4.02E-12  | 2.71  |
| AFAP1L2   | 3.42E-09  | 1.62  | 2.65E-09  | 1.63  | 4.96E-12  | 2.02  | 8.56E-11  | 1.82  |
| AFAP1L2   | 3.42E-09  | 1.62  | 2.65E-09  | 1.63  | 4.96E-12  | 2.02  | 8.56E-11  | 1.82  |
| AFAP1L2   | 3.42E-09  | 1.62  | 2.65E-09  | 1.63  | 4.96E-12  | 2.02  | 8.56E-11  | 1.82  |
| DLG4      | 1.40E-07  | 1.84  | 1.12E-10  | 2.54  | 3.74E-07  | 1.77  | 1.62E-09  | 2.22  |
| PNMA2     | 0.826882  | -1.02 | 0.0109709 | -1.23 | 0.0205466 | 1.20  | 0.0359857 | -1.18 |
| PNMA2     | 0.826882  | -1.02 | 0.0109709 | -1.23 | 0.0205466 | 1.20  | 0.0359857 | -1.18 |
| PNMA2     | 0.826882  | -1.02 | 0.0109709 | -1.23 | 0.0205466 | 1.20  | 0.0359857 | -1.18 |
| MSRB3     | 0.0093819 | -1.16 | 0.0011935 | -1.22 | 0.0085375 | 1.16  | 1.80E-05  | 1.34  |
| TMEM59L   | 0.500166  | -1.03 | 0.0030076 | 1.15  | 2.17E-06  | 1.31  | 5.77E-07  | 1.35  |

**TABLE 2**  
**N-SB Signature**

|           |           |       |           |       |           |       |           |       |
|-----------|-----------|-------|-----------|-------|-----------|-------|-----------|-------|
| MEX3B     | 3.99E-08  | 2.00  | 1.97E-08  | 2.06  | 1.12E-08  | 2.11  | 1.55E-08  | 2.08  |
| MEX3B     | 3.99E-08  | 2.00  | 1.97E-08  | 2.06  | 1.12E-08  | 2.11  | 1.55E-08  | 2.08  |
| MEX3B     | 3.99E-08  | 2.00  | 1.97E-08  | 2.06  | 1.12E-08  | 2.11  | 1.55E-08  | 2.08  |
| KLK3      | 0.486829  | 1.03  | 0.0033468 | 1.17  | 1.65E-07  | 1.45  | 7.14E-09  | 1.58  |
| PCDHB4    | 8.67E-07  | 1.66  | 8.47E-08  | 1.81  | 0.0048378 | 1.26  | 2.84E-09  | 2.08  |
| TRIB2     | 7.13E-07  | -1.48 | 0.0003791 | 1.26  | 4.62E-06  | 1.41  | 1.00E-07  | 1.56  |
| GRM3      | 9.85E-12  | 2.58  | 1.60E-11  | 2.52  | 8.19E-09  | 1.91  | 2.64E-09  | 2.00  |
| GRM3      | 9.85E-12  | 2.58  | 1.60E-11  | 2.52  | 8.19E-09  | 1.91  | 2.64E-09  | 2.00  |
| CCDC136   | 2.37E-09  | 2.10  | 8.92E-12  | 2.77  | 3.71E-10  | 2.29  | 1.13E-12  | 3.13  |
| CCDC136   | 2.37E-09  | 2.10  | 8.92E-12  | 2.77  | 3.71E-10  | 2.29  | 1.13E-12  | 3.13  |
| NAV1      | 6.23E-14  | 4.95  | 1.09E-15  | 7.22  | 3.53E-15  | 6.42  | 2.39E-16  | 8.48  |
| NDP       | 2.14E-06  | 1.93  | 9.12E-12  | 4.05  | 1.27E-10  | 3.35  | 3.30E-08  | 2.39  |
| NDP       | 2.14E-06  | 1.93  | 9.12E-12  | 4.05  | 1.27E-10  | 3.35  | 3.30E-08  | 2.39  |
| NDP       | 2.14E-06  | 1.93  | 9.12E-12  | 4.05  | 1.27E-10  | 3.35  | 3.30E-08  | 2.39  |
| CEP57     | 2.81E-06  | 1.47  | 1.21E-08  | 1.74  | 7.75E-07  | 1.52  | 3.49E-07  | 1.56  |
| RNF175    | 5.67E-09  | 1.60  | 1.35E-09  | 1.66  | 4.51E-11  | 1.86  | 4.68E-12  | 2.01  |
| RNF175    | 5.67E-09  | 1.60  | 1.35E-09  | 1.66  | 4.51E-11  | 1.86  | 4.68E-12  | 2.01  |
| KLHDC8A   | 0.0001335 | -1.35 | 0.0002542 | -1.32 | 7.53E-08  | 1.68  | 4.62E-05  | 1.39  |
| SCARNA9   | 0.230522  | -1.09 | 3.91E-07  | 1.71  | 4.99E-11  | 2.52  | 2.00E-10  | 2.35  |
| HS.573138 | 0.0064614 | 1.23  | 7.11E-07  | 1.63  | 2.52E-08  | 1.83  | 1.07E-05  | 1.49  |
| RHBDL1    | 0.000315  | -1.41 | 0.517008  | -1.05 | 1.38E-07  | -1.86 | 4.88E-06  | -1.62 |
| HS.448059 | 0.0053866 | 1.36  | 3.32E-06  | 1.87  | 0.0011891 | 1.45  | 4.72E-10  | 2.99  |
| EPHA2     | 1.72E-08  | -2.64 | 3.24E-06  | -1.98 | 0.598073  | -1.06 | 0.310185  | -1.12 |
| BCHE      | 0.399782  | -1.07 | 1.08E-05  | 1.57  | 0.0013445 | 1.33  | 1.35E-06  | 1.69  |
| BCHE      | 0.399782  | -1.07 | 1.08E-05  | 1.57  | 0.0013445 | 1.33  | 1.35E-06  | 1.69  |
| PPP1R3C   | 1.31E-11  | 2.70  | 2.48E-08  | 1.90  | 7.98E-10  | 2.20  | 1.00E-07  | 1.80  |
| ZNF397    | 6.62E-12  | 2.35  | 5.95E-09  | 1.79  | 0.016081  | 1.17  | 7.15E-13  | 2.63  |
| NHLH1     | 0.682382  | -1.03 | 0.899365  | -1.01 | 0.0463915 | 1.14  | 0.0004601 | 1.31  |
| NRCAM     | 2.88E-13  | 2.66  | 2.65E-16  | 4.10  | 1.25E-18  | 6.41  | 4.61E-16  | 3.94  |
| HS.568639 | 0.0002645 | 1.36  | 3.60E-08  | 1.82  | 4.16E-08  | 1.81  | 2.41E-08  | 1.85  |
| ELP4      | 1.49E-09  | 2.30  | 9.98E-13  | 3.49  | 4.11E-07  | 1.80  | 1.72E-11  | 2.92  |
| ADCY6     | 6.13E-11  | 3.44  | 2.83E-11  | 3.63  | 1.96E-12  | 4.45  | 1.72E-13  | 5.48  |
| HS.475334 | 5.05E-11  | 2.08  | 1.78E-13  | 2.70  | 1.75E-10  | 1.98  | 2.05E-11  | 2.16  |
| SHANK3    | 1.53E-08  | 2.13  | 1.20E-10  | 2.73  | 1.53E-11  | 3.08  | 2.42E-12  | 3.47  |
| LOC284422 | 5.15E-05  | 1.55  | 1.01E-08  | 2.22  | 0.791409  | -1.02 | 0.888469  | 1.01  |
| DIO1      | 1.44E-05  | 1.44  | 2.52E-09  | 1.91  | 4.97E-09  | 1.86  | 6.26E-08  | 1.70  |
| HEYL      | 0.0358802 | 1.16  | 0.133369  | -1.11 | 0.813814  | -1.02 | 0.702742  | 1.03  |
| TFDP2     | 0.703439  | 1.03  | 0.127976  | 1.11  | 0.138178  | -1.11 | 2.77E-07  | 1.64  |
| SARM1     | 0.0180028 | 1.15  | 0.107388  | 1.09  | 1.20E-08  | 1.64  | 3.24E-06  | 1.41  |
| TBC1D26   | 0.744174  | 1.02  | 8.05E-10  | 1.98  | 0.174778  | 1.09  | 3.88E-09  | 1.87  |
| SEMA6C    | 3.08E-07  | 1.59  | 1.61E-06  | 1.51  | 0.0006377 | 1.28  | 4.35E-06  | 1.47  |
| ZDHHC14   | 0.0001181 | -1.41 | 0.0014679 | -1.30 | 6.44E-06  | 1.54  | 0.0303797 | 1.18  |
| ZDHHC14   | 0.0001181 | -1.41 | 0.0014679 | -1.30 | 6.44E-06  | 1.54  | 0.0303797 | 1.18  |
| MYL4      | 0.0119976 | 1.15  | 0.262876  | 1.06  | 3.79E-08  | 1.55  | 2.04E-06  | 1.40  |
| PTN       | 7.09E-05  | 1.51  | 7.05E-06  | 1.64  | 1.31E-08  | 2.14  | 3.80E-06  | 1.68  |
| PTN       | 7.09E-05  | 1.51  | 7.05E-06  | 1.64  | 1.31E-08  | 2.14  | 3.80E-06  | 1.68  |
| PTN       | 7.09E-05  | 1.51  | 7.05E-06  | 1.64  | 1.31E-08  | 2.14  | 3.80E-06  | 1.68  |
| HS.26409  | 1.92E-06  | 1.69  | 6.30E-11  | 2.70  | 9.87E-11  | 2.64  | 5.10E-13  | 3.65  |
| EGF       | 1.50E-05  | -1.47 | 0.0039726 | -1.25 | 0.349377  | -1.07 | 0.0056037 | 1.23  |
| EGF       | 1.50E-05  | -1.47 | 0.0039726 | -1.25 | 0.349377  | -1.07 | 0.0056037 | 1.23  |
| SLC2A1    | 3.63E-12  | -2.96 | 2.31E-14  | -4.14 | 0.0721134 | 1.15  | 3.03E-07  | -1.74 |

**TABLE 2**  
**N-SB Signature**

|           |           |       |           |       |           |       |           |       |
|-----------|-----------|-------|-----------|-------|-----------|-------|-----------|-------|
| SLC2A1    | 3.63E-12  | -2.96 | 2.31E-14  | -4.14 | 0.0721134 | 1.15  | 3.03E-07  | -1.74 |
| NDRG4     | 0.960164  | -1.00 | 0.242474  | 1.08  | 0.0868664 | 1.12  | 0.368988  | -1.06 |
| UTP3      | 7.52E-12  | -1.72 | 6.82E-13  | -1.86 | 5.08E-14  | -2.03 | 1.23E-10  | -1.59 |
| OTOF      | 6.60E-07  | 1.41  | 1.74E-09  | 1.64  | 1.58E-08  | 1.54  | 1.41E-08  | 1.55  |
| GRM2      | 0.0011635 | 1.24  | 0.0533347 | 1.12  | 0.0061519 | 1.19  | 0.0184569 | 1.16  |
| GRM2      | 0.0011635 | 1.24  | 0.0533347 | 1.12  | 0.0061519 | 1.19  | 0.0184569 | 1.16  |
| HESX1     | 7.85E-13  | 6.57  | 1.85E-12  | 6.04  | 6.95E-10  | 3.64  | 5.57E-05  | -1.82 |
| DNHD1     | 0.218145  | -1.06 | 5.25E-06  | 1.35  | 0.0109091 | 1.15  | 2.95E-08  | 1.53  |
| RCOR2     | 0.0183259 | 1.24  | 0.147209  | 1.14  | 0.0001469 | 1.48  | 0.0108644 | 1.27  |
| ENPP2     | 0.0001764 | 1.31  | 0.166201  | 1.09  | 0.259343  | 1.07  | 9.16E-08  | 1.62  |
| LOC727994 | 0.0459589 | 1.15  | 0.0001631 | 1.37  | 8.07E-06  | 1.49  | 0.0001117 | 1.38  |
| ZNF533    | 3.61E-19  | 4.36  | 2.92E-19  | 4.43  | 8.18E-15  | 2.41  | 6.55E-18  | 3.56  |
| ZNF533    | 3.61E-19  | 4.36  | 2.92E-19  | 4.43  | 8.18E-15  | 2.41  | 6.55E-18  | 3.56  |
| ZNF533    | 3.61E-19  | 4.36  | 2.92E-19  | 4.43  | 8.18E-15  | 2.41  | 6.55E-18  | 3.56  |
| MYT1      | 7.37E-12  | 2.89  | 6.45E-12  | 2.91  | 2.02E-08  | 1.96  | 7.14E-10  | 2.27  |
| CTNND2    | 8.95E-06  | 1.58  | 2.68E-05  | 1.52  | 0.0007111 | 1.36  | 7.05E-10  | 2.34  |
| SHROOM3   | 9.88E-06  | -1.36 | 3.48E-08  | -1.58 | 0.0001846 | -1.27 | 0.699029  | 1.02  |
| SHROOM3   | 9.88E-06  | -1.36 | 3.48E-08  | -1.58 | 0.0001846 | -1.27 | 0.699029  | 1.02  |
| DRD1IP    | 0.0095672 | 1.26  | 1.73E-08  | 2.08  | 7.73E-07  | 1.77  | 4.90E-09  | 2.20  |
| HS.324981 | 0.0160563 | 1.18  | 0.0045242 | 1.23  | 0.128966  | 1.11  | 1.26E-08  | 1.80  |
| HS.324981 | 0.0160563 | 1.18  | 0.0045242 | 1.23  | 0.128966  | 1.11  | 1.26E-08  | 1.80  |
| HS.569985 | 0.32513   | 1.08  | 8.66E-07  | 1.71  | 3.70E-05  | 1.50  | 3.74E-05  | 1.50  |
| AP1S2     | 0.116941  | 1.09  | 2.11E-09  | -1.67 | 3.13E-05  | -1.31 | 0.0002841 | -1.25 |
| BTBD15    | 8.75E-07  | -1.50 | 5.01E-09  | -1.76 | 4.83E-10  | -1.92 | 0.0045775 | -1.20 |
| DUSP4     | 2.08E-10  | 2.43  | 9.78E-09  | 2.03  | 3.54E-11  | 2.67  | 1.04E-07  | 1.84  |
| DUSP4     | 2.08E-10  | 2.43  | 9.78E-09  | 2.03  | 3.54E-11  | 2.67  | 1.04E-07  | 1.84  |
| CXORF57   | 1.73E-05  | 1.46  | 7.09E-08  | 1.75  | 8.62E-07  | 1.61  | 1.34E-07  | 1.71  |
| BEGAIN    | 1.20E-06  | 1.45  | 3.92E-08  | 1.59  | 1.97E-08  | 1.63  | 5.21E-09  | 1.70  |
| HS.170035 | 0.0008032 | 1.48  | 2.53E-11  | 3.72  | 0.238602  | -1.13 | 4.14E-05  | 1.68  |
| ACTN3     | 3.78E-13  | 4.08  | 1.04E-15  | 6.81  | 1.50E-12  | 3.69  | 7.31E-15  | 5.66  |
| SPOCK1    | 9.95E-09  | -1.67 | 0.111598  | -1.10 | 1.43E-08  | -1.65 | 0.0016387 | -1.22 |
| ATHL1     | 0.0826463 | 1.19  | 7.56E-08  | 2.20  | 0.499461  | 1.07  | 0.143346  | 1.16  |
| CPXM1     | 5.77E-10  | 1.92  | 5.10E-14  | 2.96  | 1.24E-13  | 2.82  | 2.48E-13  | 2.72  |
| TNFAIP2   | 0.0084567 | -1.28 | 0.108349  | -1.15 | 0.0059643 | -1.30 | 0.0219463 | -1.24 |
| PTH2      | 2.72E-08  | 2.49  | 1.79E-10  | 3.41  | 1.77E-12  | 4.87  | 1.17E-08  | 2.61  |
| FNDC5     | 1.53E-08  | 2.32  | 1.27E-07  | 2.08  | 9.02E-13  | 4.31  | 3.88E-11  | 3.28  |
| NKAIN4    | 1.70E-07  | 1.87  | 6.88E-08  | 1.94  | 2.10E-14  | 4.69  | 3.26E-08  | 2.00  |
| CAMK2N1   | 1.65E-05  | 1.39  | 1.03E-14  | 3.25  | 1.18E-13  | 2.82  | 8.83E-18  | 5.47  |
| CAMK2N1   | 1.65E-05  | 1.39  | 1.03E-14  | 3.25  | 1.18E-13  | 2.82  | 8.83E-18  | 5.47  |
| CAMK2N1   | 1.65E-05  | 1.39  | 1.03E-14  | 3.25  | 1.18E-13  | 2.82  | 8.83E-18  | 5.47  |
| GFRA2     | 0.112599  | 1.12  | 0.0006309 | 1.31  | 0.180186  | 1.10  | 0.0011376 | 1.29  |
| LAG3      | 6.07E-08  | 1.56  | 3.44E-10  | 1.83  | 2.58E-07  | 1.50  | 0.0002541 | 1.27  |
| MEG3      | 1.57E-05  | 1.97  | 3.96E-08  | 2.81  | 7.66E-06  | 2.05  | 3.03E-05  | 1.91  |
| LCTL      | 0.477273  | 1.05  | 0.0221006 | 1.20  | 0.0096082 | 1.23  | 0.0185191 | -1.20 |
| POU3F1    | 2.80E-17  | 4.86  | 1.87E-16  | 4.19  | 1.13E-12  | 2.48  | 1.42E-13  | 2.76  |
| POU3F1    | 2.80E-17  | 4.86  | 1.87E-16  | 4.19  | 1.13E-12  | 2.48  | 1.42E-13  | 2.76  |
| POU3F1    | 2.80E-17  | 4.86  | 1.87E-16  | 4.19  | 1.13E-12  | 2.48  | 1.42E-13  | 2.76  |
| NRXN2     | 7.96E-11  | 3.27  | 6.40E-11  | 3.32  | 2.68E-11  | 3.52  | 2.61E-10  | 3.03  |
| KIAA1644  | 0.0082911 | -1.26 | 0.0176863 | -1.23 | 0.0893507 | -1.15 | 0.0011217 | -1.35 |
| KIAA1644  | 0.0082911 | -1.26 | 0.0176863 | -1.23 | 0.0893507 | -1.15 | 0.0011217 | -1.35 |
| HS.574768 | 1.91E-09  | 2.11  | 2.73E-12  | 2.95  | 4.11E-10  | 2.27  | 2.09E-12  | 3.00  |

**TABLE 2**  
**N-SB Signature**

|           |           |       |           |       |           |       |           |       |
|-----------|-----------|-------|-----------|-------|-----------|-------|-----------|-------|
| HS.574768 | 1.91E-09  | 2.11  | 2.73E-12  | 2.95  | 4.11E-10  | 2.27  | 2.09E-12  | 3.00  |
| RCBTB2    | 0.0826902 | 1.11  | 0.218698  | 1.08  | 0.0006304 | 1.27  | 2.00E-05  | 1.38  |
| EPHB2     | 2.07E-13  | 2.69  | 7.51E-13  | 2.52  | 4.23E-12  | 2.32  | 9.91E-09  | 1.72  |
| MGC61598  | 1.30E-09  | 1.70  | 1.52E-09  | 1.69  | 3.35E-06  | 1.38  | 1.85E-09  | 1.68  |
| EDG3      | 3.94E-07  | 1.93  | 1.30E-08  | 2.27  | 1.02E-13  | 4.89  | 6.05E-06  | 1.72  |
| EDG3      | 3.94E-07  | 1.93  | 1.30E-08  | 2.27  | 1.02E-13  | 4.89  | 6.05E-06  | 1.72  |
| EDG3      | 3.94E-07  | 1.93  | 1.30E-08  | 2.27  | 1.02E-13  | 4.89  | 6.05E-06  | 1.72  |
| TCEAL7    | 0.022403  | -1.22 | 0.0324064 | -1.21 | 0.679632  | -1.03 | 0.0846848 | 1.16  |
| SPRY2     | 1.21E-06  | -1.66 | 0.611225  | -1.04 | 3.39E-09  | 2.09  | 7.35E-05  | -1.44 |
| LOC400406 | 1.14E-10  | 2.33  | 4.15E-12  | 2.77  | 3.65E-08  | 1.83  | 9.08E-09  | 1.93  |
| FHL1      | 0.0168389 | -1.17 | 0.0471069 | -1.14 | 5.29E-07  | -1.56 | 0.0055085 | -1.21 |
| CCDC109B  | 2.44E-07  | -1.46 | 3.65E-08  | -1.53 | 1.57E-09  | -1.68 | 9.26E-06  | -1.34 |
| C20ORF103 | 0.0120638 | -1.26 | 0.0080831 | -1.28 | 4.87E-14  | 4.72  | 2.62E-08  | 2.09  |
| C20ORF103 | 0.0120638 | -1.26 | 0.0080831 | -1.28 | 4.87E-14  | 4.72  | 2.62E-08  | 2.09  |
| C20ORF103 | 0.0120638 | -1.26 | 0.0080831 | -1.28 | 4.87E-14  | 4.72  | 2.62E-08  | 2.09  |
| JPH4      | 0.0103224 | 1.26  | 0.0005642 | 1.39  | 0.0089668 | -1.26 | 0.24763   | -1.10 |
| CLCF1     | 0.0085092 | 1.29  | 1.09E-05  | 1.66  | 8.85E-08  | 2.03  | 0.0008238 | 1.41  |
| CDH17     | 0.909355  | -1.01 | 7.89E-05  | 1.45  | 0.0455107 | 1.17  | 0.0024633 | 1.30  |
| CRYBA4    | 3.93E-05  | 1.56  | 1.89E-10  | 2.73  | 1.52E-12  | 3.71  | 2.62E-08  | 2.12  |
| MN1       | 7.44E-14  | 4.94  | 1.95E-14  | 5.55  | 7.11E-12  | 3.49  | 3.63E-14  | 5.26  |
| MN1       | 7.44E-14  | 4.94  | 1.95E-14  | 5.55  | 7.11E-12  | 3.49  | 3.63E-14  | 5.26  |
| ANGPTL2   | 1.82E-08  | 2.12  | 0.0211589 | 1.23  | 4.85E-08  | 2.03  | 0.000881  | 1.38  |
| LSAMP     | 3.46E-07  | 1.57  | 3.53E-07  | 1.57  | 2.60E-08  | 1.71  | 1.14E-11  | 2.31  |
| LOC133993 | 8.50E-08  | -1.55 | 3.34E-06  | -1.41 | 1.80E-08  | -1.62 | 2.02E-08  | -1.61 |
| LOC133993 | 8.50E-08  | -1.55 | 3.34E-06  | -1.41 | 1.80E-08  | -1.62 | 2.02E-08  | -1.61 |
| C6ORF170  | 1.65E-05  | 1.51  | 0.0001645 | 1.40  | 0.0032728 | 1.28  | 2.47E-05  | 1.49  |
| KAL1      | 7.04E-11  | -2.68 | 2.71E-05  | -1.54 | 0.0034497 | -1.30 | 1.34E-10  | -2.59 |
| KAL1      | 7.04E-11  | -2.68 | 2.71E-05  | -1.54 | 0.0034497 | -1.30 | 1.34E-10  | -2.59 |
| KAL1      | 7.04E-11  | -2.68 | 2.71E-05  | -1.54 | 0.0034497 | -1.30 | 1.34E-10  | -2.59 |
| IFIT1     | 3.88E-07  | 2.04  | 3.69E-06  | 1.84  | 3.91E-13  | 4.91  | 2.23E-06  | 1.88  |
| IFIT1     | 3.88E-07  | 2.04  | 3.69E-06  | 1.84  | 3.91E-13  | 4.91  | 2.23E-06  | 1.88  |
| IFIT1     | 3.88E-07  | 2.04  | 3.69E-06  | 1.84  | 3.91E-13  | 4.91  | 2.23E-06  | 1.88  |
| HS.537002 | 0.0284167 | 1.18  | 4.49E-05  | 1.44  | 0.833991  | 1.02  | 0.0144236 | 1.21  |
| HS.537002 | 0.0284167 | 1.18  | 4.49E-05  | 1.44  | 0.833991  | 1.02  | 0.0144236 | 1.21  |
| GAD2      | 0.935334  | -1.00 | 6.57E-05  | 1.30  | 4.41E-17  | 3.97  | 0.0164456 | 1.15  |
| CD200     | 2.27E-08  | -1.37 | 2.76E-09  | -1.43 | 2.27E-08  | -1.37 | 1.04E-06  | -1.28 |
| LOC150297 | 0.283258  | 1.06  | 0.0108645 | 1.15  | 0.0002429 | 1.25  | 0.0023879 | 1.19  |
| GNRH1     | 0.009732  | 1.19  | 0.0001508 | 1.32  | 0.732754  | -1.02 | 0.0001905 | 1.31  |
| CPT1C     | 4.37E-10  | 2.48  | 1.93E-11  | 2.95  | 1.77E-08  | 2.07  | 1.25E-11  | 3.03  |
| CRABP1    | 2.41E-11  | 2.08  | 1.27E-08  | 1.67  | 3.87E-06  | 1.42  | 1.07E-06  | 1.47  |
| CRABP1    | 2.41E-11  | 2.08  | 1.27E-08  | 1.67  | 3.87E-06  | 1.42  | 1.07E-06  | 1.47  |
| NNAT      | 0.0004156 | 1.42  | 0.001953  | 1.34  | 0.0001878 | 1.46  | 0.0016418 | 1.35  |
| NNAT      | 0.0004156 | 1.42  | 0.001953  | 1.34  | 0.0001878 | 1.46  | 0.0016418 | 1.35  |
| NNAT      | 0.0004156 | 1.42  | 0.001953  | 1.34  | 0.0001878 | 1.46  | 0.0016418 | 1.35  |
| ACBD7     | 0.0010172 | 1.43  | 4.15E-05  | 1.62  | 0.0075248 | 1.32  | 0.0024639 | 1.38  |
| SALL2     | 4.68E-06  | 1.46  | 1.03E-07  | 1.63  | 7.79E-10  | 1.93  | 2.98E-09  | 1.84  |
| SALL2     | 4.68E-06  | 1.46  | 1.03E-07  | 1.63  | 7.79E-10  | 1.93  | 2.98E-09  | 1.84  |
| PRKCG     | 0.133961  | 1.10  | 0.0210837 | 1.16  | 0.934808  | 1.00  | 0.0539709 | 1.13  |
| RHPN1     | 0.0070067 | 1.22  | 2.78E-10  | 2.16  | 0.0154517 | 1.19  | 6.55E-06  | 1.50  |
| MYLK      | 0.0001646 | 1.47  | 6.59E-07  | 1.82  | 0.0008739 | 1.39  | 1.22E-06  | 1.77  |
| SNORD25   | 0.247998  | 1.11  | 4.45E-07  | 1.87  | 0.853446  | 1.02  | 1.93E-07  | 1.94  |

**TABLE 2**  
**N-SB Signature**

|           |           |       |           |       |           |       |           |       |
|-----------|-----------|-------|-----------|-------|-----------|-------|-----------|-------|
| NUAK2     | 0.104711  | 1.16  | 0.0013733 | -1.38 | 0.774256  | -1.03 | 0.699086  | 1.03  |
| NUAK2     | 0.104711  | 1.16  | 0.0013733 | -1.38 | 0.774256  | -1.03 | 0.699086  | 1.03  |
| SMOC1     | 0.190405  | 1.10  | 0.180189  | 1.10  | 2.97E-05  | 1.44  | 0.0253975 | 1.18  |
| SGIP1     | 2.00E-05  | 1.51  | 2.84E-07  | 1.75  | 0.0181388 | 1.21  | 3.42E-06  | 1.60  |
| MYH11     | 0.000982  | -1.22 | 0.0096568 | -1.16 | 0.268442  | -1.06 | 0.0024013 | -1.20 |
| CYP46A1   | 4.55E-06  | 1.65  | 6.76E-05  | 1.49  | 9.12E-05  | 1.48  | 4.10E-06  | 1.65  |
| CELSR2    | 1.26E-08  | 2.12  | 3.93E-10  | 2.52  | 3.15E-06  | 1.68  | 2.29E-10  | 2.59  |
| CELSR2    | 1.26E-08  | 2.12  | 3.93E-10  | 2.52  | 3.15E-06  | 1.68  | 2.29E-10  | 2.59  |
| TMEM16H   | 0.007764  | 1.27  | 6.64E-06  | 1.64  | 0.311394  | -1.09 | 0.0652643 | 1.17  |
| EMP3      | 2.39E-12  | -2.38 | 7.81E-16  | -3.76 | 1.91E-09  | -1.81 | 4.09E-08  | -1.64 |
| EMP3      | 2.39E-12  | -2.38 | 7.81E-16  | -3.76 | 1.91E-09  | -1.81 | 4.09E-08  | -1.64 |
| EMP3      | 2.39E-12  | -2.38 | 7.81E-16  | -3.76 | 1.91E-09  | -1.81 | 4.09E-08  | -1.64 |
| MPPED1    | 0.707318  | -1.02 | 0.0998393 | 1.11  | 0.0001979 | 1.30  | 0.0004427 | 1.28  |
| COL8A2    | 0.956277  | -1.00 | 0.000207  | -1.33 | 0.042228  | -1.15 | 2.74E-05  | -1.41 |
| HS.120377 | 0.0561046 | -1.20 | 0.0215291 | 1.25  | 0.0001732 | -1.50 | 0.0658931 | -1.19 |
| EPHB1     | 2.66E-05  | 1.47  | 1.46E-06  | 1.61  | 1.58E-05  | 1.49  | 0.0011376 | 1.31  |
| UPK1A     | 6.94E-10  | 1.96  | 4.30E-13  | 2.76  | 3.78E-10  | 2.01  | 2.66E-08  | 1.72  |
| CA4       | 0.0001749 | 1.34  | 6.22E-07  | 1.57  | 1.34E-11  | 2.37  | 2.64E-08  | 1.74  |
| CA4       | 0.0001749 | 1.34  | 6.22E-07  | 1.57  | 1.34E-11  | 2.37  | 2.64E-08  | 1.74  |
| CA4       | 0.0001749 | 1.34  | 6.22E-07  | 1.57  | 1.34E-11  | 2.37  | 2.64E-08  | 1.74  |
| HS.130960 | 3.79E-06  | 1.55  | 5.40E-06  | 1.53  | 1.20E-06  | 1.60  | 0.0363416 | 1.17  |
| FZD8      | 1.27E-13  | 5.59  | 4.01E-14  | 6.22  | 1.66E-13  | 5.45  | 3.05E-10  | 3.07  |
| PTGS1     | 1.11E-11  | 2.58  | 7.86E-14  | 3.45  | 1.55E-08  | 1.87  | 1.38E-10  | 2.28  |
| HS.277205 | 2.62E-08  | 1.62  | 2.02E-05  | 1.36  | 3.88E-06  | 1.41  | 0.0081489 | 1.17  |
| HS.277205 | 2.62E-08  | 1.62  | 2.02E-05  | 1.36  | 3.88E-06  | 1.41  | 0.0081489 | 1.17  |
| NPIP      | 0.018855  | -1.23 | 0.0446548 | 1.19  | 0.0004176 | -1.41 | 0.0010948 | -1.36 |
| PAK3      | 3.09E-14  | 3.13  | 1.36E-11  | 2.28  | 2.48E-10  | 2.01  | 8.03E-13  | 2.61  |
| PAK3      | 3.09E-14  | 3.13  | 1.36E-11  | 2.28  | 2.48E-10  | 2.01  | 8.03E-13  | 2.61  |
| DUSP6     | 1.18E-09  | -2.96 | 7.92E-05  | -1.66 | 0.0002464 | 1.58  | 3.67E-06  | -1.91 |
| DUSP6     | 1.18E-09  | -2.96 | 7.92E-05  | -1.66 | 0.0002464 | 1.58  | 3.67E-06  | -1.91 |
| MIAT      | 1.82E-06  | 2.17  | 9.35E-10  | 3.49  | 4.34E-10  | 3.70  | 2.13E-11  | 4.71  |
| MIAT      | 1.82E-06  | 2.17  | 9.35E-10  | 3.49  | 4.34E-10  | 3.70  | 2.13E-11  | 4.71  |
| MIAT      | 1.82E-06  | 2.17  | 9.35E-10  | 3.49  | 4.34E-10  | 3.70  | 2.13E-11  | 4.71  |
| CDC42EP4  | 1.12E-07  | 2.25  | 5.68E-06  | 1.85  | 6.26E-11  | 3.55  | 1.39E-07  | 2.22  |
| CDC42EP4  | 1.12E-07  | 2.25  | 5.68E-06  | 1.85  | 6.26E-11  | 3.55  | 1.39E-07  | 2.22  |
| IRS2      | 8.16E-10  | 1.72  | 1.77E-08  | 1.57  | 3.23E-11  | 1.92  | 6.90E-10  | 1.73  |
| HS.128236 | 0.0009388 | 1.30  | 4.78E-07  | 1.64  | 3.08E-06  | 1.54  | 0.0017468 | 1.28  |
| LRCH4     | 0.601652  | -1.06 | 0.628444  | 1.06  | 0.0090633 | -1.39 | 0.720474  | 1.04  |
| FUT8      | 5.11E-15  | 4.05  | 2.32E-14  | 3.64  | 5.07E-10  | 2.11  | 3.83E-10  | 2.14  |
| BCL6B     | 2.29E-15  | 2.85  | 2.31E-16  | 3.25  | 4.91E-11  | 1.85  | 2.57E-09  | 1.63  |
| LOC645460 | 0.423701  | -1.07 | 0.0014316 | 1.35  | 0.390101  | -1.07 | 0.0120986 | 1.25  |
| PCDH18    | 4.73E-07  | 2.29  | 5.95E-06  | 2.00  | 0.430758  | 1.10  | 0.223709  | 1.15  |
| PCDH18    | 4.73E-07  | 2.29  | 5.95E-06  | 2.00  | 0.430758  | 1.10  | 0.223709  | 1.15  |
| PCDH18    | 4.73E-07  | 2.29  | 5.95E-06  | 2.00  | 0.430758  | 1.10  | 0.223709  | 1.15  |
| LRR3B     | 0.107476  | 1.10  | 0.0002329 | 1.29  | 5.73E-06  | 1.42  | 0.767336  | 1.02  |
| EMX1      | 0.120304  | -1.10 | 0.910049  | 1.01  | 0.0001655 | 1.32  | 2.55E-08  | 1.70  |
| ARHGEF6   | 6.22E-10  | 1.65  | 0.0004162 | 1.21  | 1.05E-09  | 1.63  | 1.09E-13  | 2.25  |
| PTPRZ1    | 0.088455  | -1.15 | 0.39638   | -1.07 | 0.0615098 | -1.17 | 0.142085  | 1.13  |
| PTPRZ1    | 0.088455  | -1.15 | 0.39638   | -1.07 | 0.0615098 | -1.17 | 0.142085  | 1.13  |
| PTPRZ1    | 0.088455  | -1.15 | 0.39638   | -1.07 | 0.0615098 | -1.17 | 0.142085  | 1.13  |
| IGFBP3    | 0.936483  | -1.01 | 1.14E-05  | -1.59 | 1.91E-16  | 7.14  | 6.65E-10  | 2.39  |

**TABLE 2**  
**N-SB Signature**

|           |           |       |           |       |           |       |           |       |
|-----------|-----------|-------|-----------|-------|-----------|-------|-----------|-------|
| IGFBP3    | 0.936483  | -1.01 | 1.14E-05  | -1.59 | 1.91E-16  | 7.14  | 6.65E-10  | 2.39  |
| IGFBP3    | 0.936483  | -1.01 | 1.14E-05  | -1.59 | 1.91E-16  | 7.14  | 6.65E-10  | 2.39  |
| IGFBP3    | 0.936483  | -1.01 | 1.14E-05  | -1.59 | 1.91E-16  | 7.14  | 6.65E-10  | 2.39  |
| NKD2      | 4.14E-08  | 1.66  | 2.42E-06  | 1.47  | 0.917168  | -1.01 | 0.0001254 | 1.33  |
| RFPL2     | 0.656856  | -1.03 | 0.254711  | 1.07  | 0.0381474 | 1.14  | 0.0081361 | 1.19  |
| CACNG7    | 0.0002755 | 1.39  | 3.62E-08  | 1.91  | 0.0008248 | 1.34  | 0.0004911 | 1.36  |
| GBX2      | 0.233876  | -1.09 | 0.544168  | 1.04  | 9.38E-07  | 1.61  | 0.589229  | -1.04 |
| TNRC4     | 0.0057598 | 1.20  | 0.312309  | 1.06  | 2.81E-08  | 1.67  | 0.186273  | 1.08  |
| LRRC20    | 0.0008333 | 1.26  | 0.0054987 | 1.20  | 0.0365889 | -1.14 | 0.0003088 | 1.29  |
| LRRC20    | 0.0008333 | 1.26  | 0.0054987 | 1.20  | 0.0365889 | -1.14 | 0.0003088 | 1.29  |
| FAM132A   | 0.208397  | 1.12  | 0.0188336 | 1.25  | 0.134826  | -1.15 | 0.113919  | 1.15  |
| CA3       | 0.994926  | 1.00  | 0.269353  | -1.07 | 0.212727  | 1.08  | 0.859357  | 1.01  |
| LOC644733 | 0.0446226 | 1.14  | 0.0181466 | -1.17 | 0.0071111 | -1.20 | 0.0013584 | -1.26 |
| SYT1      | 0.848857  | -1.02 | 0.0062371 | 1.28  | 0.0729859 | -1.17 | 0.203013  | 1.11  |
| TMEM35    | 0.0007798 | 1.58  | 0.0003489 | 1.65  | 0.0240996 | 1.33  | 0.023518  | 1.33  |
| CSRP2     | 3.11E-05  | 1.30  | 8.14E-07  | 1.41  | 2.91E-09  | 1.63  | 1.04E-05  | 1.33  |
| TIAM1     | 0.0211161 | 1.27  | 0.0137351 | 1.29  | 3.69E-06  | 1.82  | 0.0005624 | 1.48  |
| RGMA      | 9.36E-15  | 5.30  | 1.15E-14  | 5.21  | 1.01E-12  | 3.68  | 1.43E-11  | 3.08  |
| ZNF69     | 0.0875019 | 1.13  | 0.0259785 | -1.18 | 0.0005395 | 1.33  | 0.973884  | 1.00  |
| ATOH8     | 0.771153  | -1.03 | 0.561875  | 1.06  | 0.0041315 | 1.35  | 0.0625757 | 1.20  |
| LOC642342 | 0.0002675 | 1.49  | 0.782963  | -1.03 | 0.0080535 | 1.31  | 0.58414   | 1.05  |
| LOC642342 | 0.0002675 | 1.49  | 0.782963  | -1.03 | 0.0080535 | 1.31  | 0.58414   | 1.05  |
| SYTL2     | 8.76E-15  | -2.45 | 4.26E-14  | -2.28 | 2.41E-13  | -2.12 | 7.44E-12  | -1.87 |
| SYDE1     | 6.66E-09  | -1.51 | 4.06E-11  | -1.74 | 5.09E-12  | -1.86 | 4.80E-12  | -1.87 |
| F12       | 0.0057092 | -1.23 | 0.0037131 | -1.25 | 1.35E-09  | -2.03 | 0.0012524 | -1.29 |
| NOTCH1    | 1.59E-06  | 2.15  | 5.25E-06  | 2.02  | 3.96E-07  | 2.33  | 1.54E-07  | 2.46  |
| ATP1B2    | 0.0008398 | 1.48  | 0.0012959 | 1.45  | 0.000571  | 1.50  | 5.57E-06  | 1.83  |
| GLCCI1    | 0.0478604 | -1.21 | 0.620705  | 1.05  | 8.09E-05  | -1.56 | 0.450032  | 1.07  |
| GLCCI1    | 0.0478604 | -1.21 | 0.620705  | 1.05  | 8.09E-05  | -1.56 | 0.450032  | 1.07  |
| FRMD4A    | 0.144221  | 1.10  | 0.731091  | 1.02  | 7.62E-08  | 1.70  | 0.018137  | -1.18 |
| C10ORF33  | 1.68E-09  | 1.78  | 1.39E-13  | 2.64  | 3.08E-09  | 1.74  | 1.02E-13  | 2.68  |
| C6ORF141  | 1.34E-18  | 6.31  | 3.77E-18  | 5.74  | 4.66E-19  | 6.99  | 2.34E-16  | 4.11  |
| C6ORF141  | 1.34E-18  | 6.31  | 3.77E-18  | 5.74  | 4.66E-19  | 6.99  | 2.34E-16  | 4.11  |
| C6ORF141  | 1.34E-18  | 6.31  | 3.77E-18  | 5.74  | 4.66E-19  | 6.99  | 2.34E-16  | 4.11  |
| LOC731429 | 0.0005545 | -1.36 | 0.406779  | -1.07 | 9.37E-06  | -1.55 | 0.581943  | -1.04 |
| LOC643624 | 0.0738213 | -1.17 | 0.0136769 | 1.26  | 0.102001  | -1.16 | 0.0621038 | 1.18  |
| C20ORF46  | 4.00E-05  | 1.65  | 1.78E-08  | 2.36  | 0.281589  | 1.11  | 0.0066943 | 1.33  |
| LGALS1    | 0.0015744 | 1.26  | 0.167943  | 1.09  | 0.0007675 | 1.28  | 1.42E-06  | 1.53  |
| NID1      | 0.0031231 | 1.29  | 4.42E-08  | 1.92  | 6.37E-07  | 1.73  | 2.85E-05  | 1.51  |
| NID1      | 0.0031231 | 1.29  | 4.42E-08  | 1.92  | 6.37E-07  | 1.73  | 2.85E-05  | 1.51  |
| TSPAN7    | 2.57E-07  | 1.71  | 4.75E-09  | 1.99  | 0.102915  | 1.13  | 4.75E-06  | 1.55  |
| VIPR2     | 0.0249677 | 1.21  | 0.0269674 | 1.20  | 6.74E-12  | 3.00  | 0.261513  | 1.09  |
| VIPR2     | 0.0249677 | 1.21  | 0.0269674 | 1.20  | 6.74E-12  | 3.00  | 0.261513  | 1.09  |
| VIPR2     | 0.0249677 | 1.21  | 0.0269674 | 1.20  | 6.74E-12  | 3.00  | 0.261513  | 1.09  |
| CDC42EP3  | 0.0105759 | -1.27 | 0.0007183 | -1.40 | 9.28E-05  | 1.50  | 0.0001259 | -1.49 |
| CACNA1H   | 0.011102  | 1.27  | 8.37E-07  | 1.83  | 3.77E-05  | 1.57  | 7.11E-05  | 1.54  |
| FHOD3     | 4.35E-15  | 3.88  | 2.44E-15  | 4.05  | 5.05E-14  | 3.30  | 1.84E-12  | 2.68  |
| FHOD3     | 4.35E-15  | 3.88  | 2.44E-15  | 4.05  | 5.05E-14  | 3.30  | 1.84E-12  | 2.68  |
| FHOD3     | 4.35E-15  | 3.88  | 2.44E-15  | 4.05  | 5.05E-14  | 3.30  | 1.84E-12  | 2.68  |
| C1ORF187  | 0.0018697 | 1.27  | 0.203496  | 1.09  | 0.0013316 | 1.28  | 0.001653  | -1.28 |
| LOC387762 | 0.187645  | 1.07  | 0.904153  | 1.01  | 6.98E-07  | 1.43  | 0.782464  | 1.01  |

**TABLE 2**  
**N-SB Signature**

|           |           |       |           |       |           |       |           |       |
|-----------|-----------|-------|-----------|-------|-----------|-------|-----------|-------|
| LOC390975 | 0.436512  | 1.06  | 1.21E-05  | 1.52  | 0.0194267 | 1.20  | 0.0005815 | 1.34  |
| GNG8      | 4.76E-09  | 2.14  | 6.39E-14  | 4.12  | 6.25E-13  | 3.51  | 1.06E-09  | 2.29  |
| GNG8      | 4.76E-09  | 2.14  | 6.39E-14  | 4.12  | 6.25E-13  | 3.51  | 1.06E-09  | 2.29  |
| LDLRAD3   | 3.91E-06  | 1.61  | 4.32E-07  | 1.75  | 0.0059415 | 1.26  | 0.0077123 | 1.25  |
| HS.146950 | 0.951985  | 1.00  | 0.390989  | -1.07 | 0.954987  | 1.00  | 0.0271123 | -1.21 |
| DLL3      | 0.0180503 | -1.22 | 0.0005254 | -1.37 | 6.44E-07  | -1.72 | 0.0013926 | -1.33 |
| DSCR6     | 1.11E-14  | 5.25  | 6.56E-14  | 4.53  | 1.24E-10  | 2.72  | 0.0237382 | 1.23  |
| ZIC4      | 0.000639  | 1.28  | 0.0003982 | 1.29  | 6.35E-07  | 1.54  | 0.069393  | 1.12  |
| ZIC4      | 0.000639  | 1.28  | 0.0003982 | 1.29  | 6.35E-07  | 1.54  | 0.069393  | 1.12  |
| ZIC4      | 0.000639  | 1.28  | 0.0003982 | 1.29  | 6.35E-07  | 1.54  | 0.069393  | 1.12  |
| LHFP      | 8.44E-16  | -2.78 | 2.97E-14  | -2.34 | 0.0025112 | 1.17  | 0.0022662 | -1.17 |
| CDH4      | 2.97E-06  | 1.57  | 0.0001345 | 1.39  | 3.51E-05  | 1.45  | 0.0001936 | 1.38  |
| FLJ30375  | 0.502558  | 1.04  | 0.609379  | -1.03 | 3.92E-07  | 1.59  | 0.500772  | -1.04 |
| HS.397465 | 4.42E-06  | 1.76  | 1.98E-05  | 1.66  | 4.26E-07  | 1.95  | 8.33E-08  | 2.11  |
| SOX21     | 2.83E-24  | 18.32 | 9.74E-24  | 15.38 | 9.14E-23  | 11.49 | 9.40E-23  | 11.45 |
| SOX21     | 2.83E-24  | 18.32 | 9.74E-24  | 15.38 | 9.14E-23  | 11.49 | 9.40E-23  | 11.45 |
| MOBKL2B   | 0.310191  | 1.10  | 0.0020254 | 1.40  | 0.0004777 | 1.48  | 0.0019271 | 1.40  |
| ALDH2     | 0.778396  | 1.02  | 0.0871934 | -1.14 | 0.0410733 | -1.17 | 0.0001672 | 1.41  |
| ELFN2     | 8.65E-12  | 2.85  | 3.30E-10  | 2.35  | 0.0098208 | 1.24  | 3.78E-10  | 2.33  |
| PTPRN2    | 0.0005403 | 1.33  | 8.65E-05  | 1.40  | 0.0001161 | 1.39  | 0.0001269 | 1.39  |
| GRASP     | 0.228077  | 1.07  | 0.273058  | 1.06  | 0.344741  | 1.05  | 0.4559    | 1.04  |
| NLGN3     | 1.17E-12  | 2.22  | 6.38E-11  | 1.90  | 3.24E-10  | 1.79  | 1.91E-10  | 1.83  |
| NLGN3     | 1.17E-12  | 2.22  | 6.38E-11  | 1.90  | 3.24E-10  | 1.79  | 1.91E-10  | 1.83  |
| SLC6A10P  | 1.97E-08  | 1.98  | 1.54E-09  | 2.21  | 7.15E-11  | 2.58  | 2.96E-09  | 2.15  |
| SLC6A10P  | 1.97E-08  | 1.98  | 1.54E-09  | 2.21  | 7.15E-11  | 2.58  | 2.96E-09  | 2.15  |
| ARHGEF4   | 1.44E-06  | 1.71  | 9.59E-08  | 1.91  | 1.08E-05  | 1.59  | 3.28E-06  | 1.66  |
| ARHGEF4   | 1.44E-06  | 1.71  | 9.59E-08  | 1.91  | 1.08E-05  | 1.59  | 3.28E-06  | 1.66  |
| CENTD3    | 0.0524888 | -1.23 | 0.45525   | -1.08 | 0.00753   | -1.34 | 0.0016902 | -1.44 |
| HTRA1     | 0.0003616 | 1.27  | 0.0029635 | 1.21  | 1.09E-05  | -1.38 | 0.153845  | -1.09 |
| HTRA1     | 0.0003616 | 1.27  | 0.0029635 | 1.21  | 1.09E-05  | -1.38 | 0.153845  | -1.09 |
| TCF3      | 0.379697  | -1.07 | 0.0407617 | 1.18  | 0.843179  | -1.02 | 0.782514  | 1.02  |
| TCF3      | 0.379697  | -1.07 | 0.0407617 | 1.18  | 0.843179  | -1.02 | 0.782514  | 1.02  |
| LOC645464 | 0.0281728 | 1.24  | 0.011665  | 1.29  | 2.92E-07  | 1.98  | 0.163212  | 1.14  |
| LOC645464 | 0.0281728 | 1.24  | 0.011665  | 1.29  | 2.92E-07  | 1.98  | 0.163212  | 1.14  |
| FLJ25404  | 6.25E-12  | 3.48  | 1.34E-11  | 3.30  | 3.48E-06  | 1.74  | 2.64E-08  | 2.16  |
| MACF1     | 0.0028526 | -1.20 | 0.0004291 | -1.25 | 0.0001494 | -1.28 | 4.54E-05  | -1.32 |
| SLC6A8    | 2.11E-06  | 1.77  | 1.28E-08  | 2.22  | 1.20E-09  | 2.50  | 8.22E-08  | 2.03  |
| SLC6A8    | 2.11E-06  | 1.77  | 1.28E-08  | 2.22  | 1.20E-09  | 2.50  | 8.22E-08  | 2.03  |
| MMP7      | 0.973803  | -1.00 | 0.771743  | -1.02 | 0.0069628 | 1.26  | 0.719147  | -1.03 |
| C3ORF58   | 0.0179464 | -1.25 | 0.003525  | -1.33 | 0.0037327 | -1.32 | 8.28E-06  | -1.66 |
| QPCT      | 0.0006073 | -1.28 | 3.76E-06  | -1.47 | 6.33E-07  | -1.55 | 4.74E-05  | -1.37 |
| TNFRSF25  | 0.0695819 | 1.29  | 0.255389  | 1.17  | 0.325696  | 1.14  | 0.0272522 | 1.37  |
| HS.550164 | 2.64E-06  | 1.46  | 1.20E-05  | 1.40  | 2.11E-12  | 2.43  | 5.32E-09  | 1.77  |
| LFNG      | 2.76E-10  | 3.12  | 2.02E-08  | 2.42  | 7.48E-13  | 4.84  | 1.17E-12  | 4.66  |
| PKD1L2    | 6.88E-05  | 1.34  | 0.0046834 | 1.20  | 0.371709  | 1.05  | 0.0002121 | 1.30  |
| HS.525171 | 0.68105   | 1.04  | 0.0891632 | 1.18  | 0.0245316 | 1.25  | 0.0003935 | 1.48  |
